1 **Reports of myocarditis and pericarditis following mRNA COVID-19 vaccines: A systematic review of**  
2 **spontaneously reported data from the UK, Europe, and the US and of the literature**

3 **Samantha Lane\*** <sup>1,2</sup>

4 <sup>1</sup> Drug Safety Research Unit, Southampton, Hampshire, UK

5 <sup>2</sup> School of Pharmacy and Biomedical Sciences, University of Portsmouth, Hampshire, UK

6

7 ORCID: 0000-0001-7532-1149

8

9 **Alison Yeomans**<sup>1</sup>

10 <sup>1</sup> Drug Safety Research Unit, Southampton, Hampshire, UK

11

12 **Saad Shakir** <sup>1,2</sup>

13 <sup>1</sup> Drug Safety Research Unit, Southampton, Hampshire, UK

14 <sup>2</sup> School of Pharmacy and Biomedical Sciences, University of Portsmouth, Hampshire, UK

15

16

17 \*Correspondence to:

18 Miss Samantha Lane

19 [Samantha.Lane@dsru.org](mailto:Samantha.Lane@dsru.org)

20 Drug Safety Research Unit, Bursledon Hall, Blundell Lane, Southampton, Hampshire, SO31 1AA

21

22 Word count: (excluding tables): 4647

23 Number of tables: 6

24 Number of figures: 4

25

**NOTE: This preprint reports new research that has not been certified by peer review and should not be used to guide clinical practice.**

## 26 **Abstract**

27 **Objectives:** To bring together spontaneously reported data from multiple countries to estimate  
28 reporting rate, and better understand risk factors for myocarditis and pericarditis following COVID-19  
29 mRNA vaccines.

30 **Design:** Systematic review of spontaneously reported data from United Kingdom (UK), United States  
31 (US), and European Union/European Economic Area (EU/EEA) and of the literature.

32 **Data sources:** UK Yellow Card scheme, Vaccine Adverse Event Reporting System (VAERS),  
33 EudraVigilance were searched from date of vaccine launch to 14-16 March 2022. PubMed/MEDLINE  
34 and Embase were searched to 15 March 2022.

35 **Eligibility criteria:** We included publicly available spontaneous reporting data for “Myocarditis” and  
36 “Pericarditis” from UK, US, and EU/EEA following COVID-19 mRNA vaccines. Pharmacoepidemiological  
37 observational studies investigating myocarditis/pericarditis following mRNA COVID-19 vaccines were  
38 included (no restrictions on language or date). Critical Appraisal Skills Programme (CASP) tools  
39 assessed study quality.

40 **Data extraction and synthesis:** Two researchers extracted data. Spontaneously reported events of  
41 myocarditis and pericarditis were presented for each data source, stratified by vaccine, age, sex, and  
42 dose (where available). Reporting rates were calculated for myocarditis and pericarditis for each  
43 population. For published pharmacoepidemiological studies, design, participant characteristics, and  
44 study results were tabulated.

45 **Results:** Overall, 18,204 myocarditis and pericarditis events have been submitted to the UK, US, and  
46 EU/EEA regulators during the study period. Males represented 62.24% (n=11,331) of myocarditis and  
47 pericarditis reports. Most reports concerned vaccinees aged <40 years and were more frequent  
48 following a second dose. Reporting rates were consistent between the data sources. Thirty-two  
49 pharmacoepidemiological studies were included; results were consistent with our spontaneous report  
50 analyses.

51 **Conclusions:** Younger vaccinees more frequently report myocarditis and pericarditis following mRNA  
52 COVID-19 vaccines than older vaccinees. Results from published literature supported the results of  
53 our analyses.

## 54 **Strengths and Limitations of the Study**

- 55 • This is the first study to bring together spontaneously reported data from the United Kingdom,  
56 United States, and Europe on myocarditis and pericarditis following mRNA COVID-19 vaccines.
- 57 • Results from this study provide evidence on the frequency of reported events of myocarditis  
58 and pericarditis following mRNA vaccines in different age groups, and by sex and vaccine dose;  
59 analyses of spontaneous reports were consolidated with results of published literature,  
60 identified by systematic review.
- 61 • Results may have been influenced by biases including different vaccination policies in each  
62 region examined, and publicity on events of myocarditis and pericarditis following mRNA  
63 vaccines.
- 64 • The study relied on outputs from spontaneous reporting systems in which the level of detail  
65 differed between the systems examined; furthermore, it is not possible to estimate incidence

66 rates using spontaneous reports due to the lack of data on the exposed population, and there  
67 is no unvaccinated comparison group.

- 68 • There is an urgent need for further pharmacoepidemiological studies to be conducted to  
69 provide more accurate estimates of the frequency, clinical course, long term outcome, effects  
70 of treatment and impact on quality of life, to address many of the limitations of spontaneous  
71 reporting.

72

## 73 1.0 Introduction

74 Messenger RNA (mRNA) based vaccines have been extensively used world-wide in the fight against  
75 COVID19 that continues to pose a threat, with many countries initiating booster campaigns, yet these  
76 are the first in their class of vaccines to be approved for use, and as such continued monitoring of their  
77 safety is required. In the 15 months since first approval mRNA-based vaccines have had several  
78 adverse reactions documented, including myocarditis and pericarditis. Signals of myocarditis and  
79 pericarditis were first identified in Israel where there had been 148 cases of myocarditis reported  
80 within 30 days of vaccination, with the majority of these cases (n=121) reported after the second dose  
81 (1). Since the emergence of this signal, multiple countries have reported myocarditis and pericarditis  
82 following mRNA COVID-19 vaccines (2) and these events have been listed in the product information  
83 for both Pfizer-BioNTech (Comirnaty) and Moderna (Spikevax) mRNA COVID-19 vaccines (3-9). The  
84 identification of this safety signal early in the vaccination programme indicated that young males were  
85 at higher risk of developing myocarditis or pericarditis, particularly after the second dose of either  
86 mRNA based COVID-19 vaccine (2, 10-12). Myocarditis and pericarditis events following COVID-19  
87 mRNA vaccines occur very rarely at a frequency of 10-20 events per 100,000 (13, 14), and the clinical  
88 course is typically mild with most cases making a full recovery (15).

89 Vaccination programmes around the world have differed in their roll-out and vaccine type used, with  
90 a general pattern that those most at risk of severe COVID-19 complications were prioritised for  
91 vaccination, followed by healthy adults and then children; in all these groups mRNA vaccines have  
92 been approved and used alongside adenovirus vector vaccines and inactivated virus vaccines around  
93 the world (4-9, 16, 17). Waves of COVID-19 infections in different countries also altered the speed of  
94 vaccine roll-out and the time interval between vaccine doses, thus interpretation of the data from  
95 several countries may reveal risk factors for myocarditis and pericarditis following exposure to COVID-  
96 19 mRNA vaccines. Here we collate spontaneous reports of myocarditis and pericarditis following  
97 COVID-19 vaccination, with a systematic review of the literature, to capture and interpret the evidence  
98 to date.

99

## 100 2.0 Materials and Methods

101

102 The data sources were spontaneous reporting system outputs of the UK Yellow Card scheme, the US  
103 Vaccine Adverse Event Reporting System (VAERS) via the CDC Wonder online tool, and the EU/EEA  
104 EudraVigilance system were used to estimate the frequency of reported cases of myocarditis and  
105 pericarditis following COVID-19 Vaccine Pfizer/BioNTech (Comirnaty) and COVID-19 Vaccine Moderna  
106 (Spikevax) (18-20). These systems collect unsolicited suspected adverse events to vaccines and  
107 medications from healthcare professionals and consumers. The process of spontaneous reporting  
108 requires suspected association with the mRNA vaccine to the event by the reporting individual. For  
109 reports following a mRNA COVID-19 vaccine, all reports coded “myocarditis” and “pericarditis” which  
110 had been spontaneously reported to these systems between the date of vaccine launch and the  
111 datalock point were counted. Cases were stratified by age, sex, and vaccine dose where these data  
112 were available.

113 The datalock point (defined as the date that searches were ran in the database) was 14 March 2022  
114 for VAERS and EudraVigilance, and 16 March 2022 for the Yellow Card scheme. Data from the Yellow  
115 Card scheme is released weekly, with data up to 16 March 2022 the closest release to the 14 March  
116 2022 datalock point used for VAERS and EudraVigilance.

117 The number of vaccinated individuals per vaccine brand in the UK, US, and EU/EEA were obtained  
118 from the websites of the MHRA, the CDC in the US, and the European Centre for Disease Prevention  
119 and Control (ECDC) up to the date closest to the datalock point for ADR spontaneous reports (11, 21,  
120 22). Reporting rates of myocarditis and pericarditis per million vaccines administered were calculated  
121 for those who had received at least one dose of each vaccine brand.

122

## 123 2.1 Literature Review

124 A systematic literature review was conducted using PubMed/Medline and Embase literature  
125 databases. No review protocol was prepared.

126 The datalock point was 15 March 2022. Studies were included if they were observational in design  
127 (excluding case reports and case series), and involved at least one patient who experienced  
128 myocarditis, pericarditis, or myopericarditis following any mRNA COVID-19 vaccine (any case  
129 definition was accepted). Pre-print manuscripts were included if no peer-reviewed version was  
130 available. Studies of other designs and studies investigating other vaccines were excluded. Studies  
131 investigating cardiac effects of SARS-CoV-2 infection were excluded. No restrictions on language or  
132 date were applied.

133 The search terms used were:

134 (myocarditis OR pericarditis OR myopericarditis) AND (covid-19) AND (vaccine)

135 Data were extracted for study design, study period, vaccine of interest, population, number of cases  
136 of myocarditis or pericarditis, and where specified the percentage of cases who were male, age, and  
137 the vaccine dose after which the event occurred. Two reviewers extracted data. These data were  
138 tabulated.

139 Study quality was assessed by two reviewers, using the relevant Critical Appraisal Skills Programme  
140 (CASP) tool (available on request) (33). Each checklist covers a different study design and contains a  
141 series of questions to critically appraise the research.

142

## 143 2.2 Patient and Public Involvement

144 Patients and the public were not consulted during this study.

145

## 146 3.0 Results

### 147 3.1 Systematic review of the literature identified thirty-two observational studies

148 In order to collate information specific to address the issue identification of characteristics of  
149 myocarditis and pericarditis following COVID-19 mRNA vaccines a detailed review of the literature was  
150 carried out, using the search terms specified in the materials of methods (Section 2.1). Initially 702  
151 records were identified, following de-duplication, assessment for eligibility and quality 32 studies were  
152 included in our analysis (Figure 1). The information extracted in these studies has been assessed  
153 alongside the evidence from spontaneous reporting systems, below.

154

### 155 3.2 Myocarditis and Pericarditis occur very rarely following COVID-19 mRNA vaccines

156 Overall, across the three spontaneous reporting databases examined covering the UK, US, and EU/EEA  
157 populations, there were a total of 18,204 events of myocarditis and pericarditis submitted to the  
158 regulators.

159 From the UK's MHRA Yellow Card scheme, 1260 reports were following Comirnaty administration, and  
160 325 reports were following Spikevax (Table 1; Figure 2A). As of 16 March 2022, it was estimated that  
161 26.2 million first doses and 23.6 million second doses of Comirnaty had been administered in the UK  
162 (REF 3). Therefore, there were approximately 48.09 cases of myocarditis and pericarditis per million  
163 vaccinees who had received at least one dose of Comirnaty (Figure 2B). To the same date,  
164 approximately 1.6 million first doses and 1.5 million second doses of Spikevax had also been  
165 administered (REF 3). Of those who had received at least one dose of Spikevax in the UK, 203.13 cases  
166 of myocarditis and pericarditis had been reported per million vaccinated (Figure 2B).

167 The US VAERS system contains 2986 reported events following Comirnaty and 1640 events following  
168 Spikevax (Table 2; Figure 2A). In the US, there had been 124.12 million vaccinees who had been fully  
169 vaccinated with Comirnaty (REF 29) giving a reporting rate of 14.70 cases of myocarditis and 9.36 cases  
170 of pericarditis per million fully vaccinated individuals, combined to 12.03 cases of myocarditis and  
171 pericarditis per million fully vaccinated with Comirnaty (Figure 2B). There had been 75.57 million  
172 people fully vaccinated with Spikevax (REF 29) therefore there were 12.35 cases of myocarditis  
173 reported per million fully vaccinated Spikevax recipients and 9.36 cases of pericarditis per million fully  
174 vaccinated Spikevax recipients, combined giving a reporting rate of both myocarditis and pericarditis  
175 as 10.86 per million Spikevax vaccinees (Figure 2B).

176 The EudraVigilance database contained the highest total reports of events with 9211 events reported  
177 following Comirnaty and 2786 following Spikevax (Table 4; Figure 2A). There had been approximately  
178 296.05 million vaccinees who had received at least one dose of Comirnaty in the EU/EEA. Therefore,  
179 the reporting rates were calculated as 14.50 reports of myocarditis and 16.61 reports of pericarditis  
180 per million Comirnaty recipients, giving a combined reporting rate of 15.56 cases of myocarditis and  
181 pericarditis per million people who received at least one dose of Comirnaty (Figure 2B). For Spikevax,  
182 there had been approximately 46.56 million first doses of Spikevax administered in the EU and EEA.  
183 Thus, reporting rates in the EU/EEA are currently 28.01 reports of myocarditis and 31.83 reports of  
184 pericarditis per million vaccinees, giving a combined reporting rate of 29.92 per million Spikevax  
185 recipients (Figure 2B).

186 In total, there were 13,573 events of myocarditis and/or pericarditis reported in the observational  
187 studies identified by systematic review of the literature.

188 While reporting rates for myocarditis and pericarditis have differed between the spontaneous  
189 reporting databases, overall, they demonstrate that these events are very rare (defined as occurring  
190 at a rate of <1 in 10,000) (23).

191

### 192 3.3 Fatalities following myocarditis and pericarditis after COVID-19 mRNA vaccines

193 There have been cases of myocarditis and pericarditis with a fatal outcome reported to spontaneous  
194 reporting systems and in the literature. There were four fatalities in the UK (0.25% of all spontaneous  
195 reports), 62 in the US (1.3% of all reports) and 56 in the EU/EEA (0.6% of all reports). Where age of  
196 fatal cases was reported (EudraVigilance and VAERS databases only), 85.83% (n=103) of fatal cases  
197 overall were aged 18 years or older. Five cases (4.17%) were aged under 18 years; all were myocarditis

198 events (6.41% of all fatal myocarditis events reported). Ten percent of fatal cases had age unspecified.  
199 All fatal cases of pericarditis reported to EudraVigilance and VAERS were aged 18 years or older.

200 Fatal cases were reported in five of the 32 included studies identified by systematic literature review  
201 (Table 6) (24-28). Overall, 0.22% (n=30) of 13,571 myocarditis or pericarditis events reported in the  
202 literature had a fatal outcome (range 0.41-45.85%; Table 6). Characteristics of fatal cases were  
203 specified in one study (24). In this study, results indicated that fatal cases of myocarditis and  
204 pericarditis occurred in the adult population. There were 15 fatal myocarditis events (median age 60  
205 [Interquartile Range (IQR) 56-78] years), 5 fatal pericarditis events (median age 71 [IQR 67-77] years),  
206 and two fatal myopericarditis events (aged 55 and 83 years).

207

208 3.4 Young males are more likely to suffer myocarditis and pericarditis following COVID-19 mRNA  
209 vaccination

210 To confirm the early evidence that young males were most susceptible to the adverse reaction of  
211 myocarditis and pericarditis (1), we compared spontaneous reporting and the literature up until 16  
212 March 2022 to determine whether this signal has been maintained since initially identified. Of the  
213 myocarditis and pericarditis events reported to the Yellow Card scheme, 60.92% were from males with  
214 a trend towards increased frequency in younger age groups (Table 1; Figure 3A). This trend of more  
215 frequent reporting from males was similar across the three regions assessed, with 72.92% in the US  
216 and 60.75% in the EU/EEA (Figure 3A), as well as similar reporting trends between the vaccine types  
217 (Figure 3B).

218 Most reports of myocarditis in the US were from vaccinees aged 18-39 years (n=1303, 47.3% of 2757  
219 reports), while in the EU 79.2% (n=4431) of reports of myocarditis were from people aged 18-64  
220 years (Table 4). In the US, 59.39% of pericarditis events were reported from males (Table 2) and the  
221 age distribution of those who reported pericarditis was wide, covering many age categories (Table 2).  
222 In the EU, 50.43% of the reported pericarditis events occurred in males (Table 4). The trend in age was  
223 less distinct, with children (3-11 years) and the elderly (aged older than 85 years) populations  
224 accounting for 35.7% and 43.97% of reported cases, respectively (Table 4).

225 Analysis of the literature determined that on average 60.31% of myocarditis and/or pericarditis events  
226 following COVID-19 mRNA vaccines occurred in males (range 50.00-100.00%). Results of these studies  
227 indicate that the incidence for myocarditis and pericarditis was higher for males than for females. Due  
228 to differences in study design it was not possible to determine the age group most susceptible to  
229 myocarditis and pericarditis from the literature as some studies were focused on adults only or  
230 children only meaning appropriate comparisons could not be carried out.

231

232 3.5 Most myocarditis and pericarditis events are reported following the second mRNA vaccine dose

233 Analysis of data following booster programme roll out has enabled detailed analysis into the frequency  
234 of reports following each dose of a COVID-19 mRNA vaccine. Data for the US is stratified by dose and  
235 demonstrates that the majority of reported myocarditis and pericarditis events occurred following the  
236 second dose (Figures 4A, 4B). For Comirnaty, of the total 1824 myocarditis events reported to VAERS,  
237 956 (52.41%) followed the second dose, while 383 (21.00%) were reported after a single dose of the  
238 vaccine (Table 3a). Similarly, 45.78% of pericarditis events were reported to VAERS following two  
239 doses of Comirnaty (n=532 of 1162 reported events where vaccine dose was specified; Table 3a). For  
240 Spikevax, 384 of 933 (41.16%) reported events of myocarditis and 305 of the 707 (43.14%) reported

241 events of pericarditis occurred following two doses of the vaccine (Table 3b). Approximately 10% of  
242 myocarditis and pericarditis events had been reported following a third dose for both vaccines up to  
243 14 March 2022 (Tables 3a and 3b).

244 This data is in agreement with other studies where 64.72% (range 25.00% and 91.78%) of myocarditis  
245 and pericarditis events occurred following the second vaccine dose (Table 6).

246

#### 247 4.0 Discussion

248 There have been a small number of reports of myocarditis and pericarditis following exposure to  
249 mRNA COVID-19 vaccines in each database examined, considering the number of people who have  
250 received a COVID-19 vaccine in each region. In all spontaneous reporting systems and for both mRNA  
251 vaccines, the reporting rate of myocarditis was higher than that of pericarditis. This may be true, or it  
252 may also reflect that the diagnosis of myocarditis is relatively more straightforward. In the UK and  
253 EU/EEA, reporting rates of myocarditis and pericarditis were higher following Spikevax compared with  
254 those for Comirnaty. However, this was not observed for the US. A full dose of Spikevax used for first  
255 and second doses contains 100 micrograms of mRNA nucleotides, whereas a full dose of Comirnaty  
256 contains 30 micrograms of the mRNA material (4, 5). This is one possible reason for the higher  
257 reporting rate of myocarditis and pericarditis observed for Spikevax in the UK population. A half-dose  
258 of Spikevax is used for booster vaccination doses; this still contains more genetic material than  
259 Comirnaty (4). Therefore, it will become increasingly important as more people receive third and  
260 subsequent booster doses of mRNA COVID-19 vaccines to monitor the frequency and severity of  
261 myocarditis and pericarditis following exposure to these vaccines.

262 The UK had the highest reporting rate for both myocarditis and pericarditis following mRNA vaccines,  
263 particularly for events following Spikevax. Reporting rates from the UK showed higher variability  
264 compared with those of the US and EU/EEA; reporting rates were higher for myocarditis and  
265 pericarditis following Spikevax in the UK, compared to EU/EEA and US reporting rates and incidence  
266 reported in the literature. This variability is potentially due to the fact that the UK MHRA Yellow Card  
267 scheme had the lowest number of spontaneous reports (Figure 1A) as well as the lowest vaccination  
268 coverage for Spikevax leading to uncertainty and variability. Analysis of multiple sources was thus  
269 essential to provide accurate reporting rates. It is possible that the UK and EU/EEA have stronger  
270 spontaneous reporting systems compared with the US, which may explain the higher reporting rates  
271 observed for this population. The frequency of events noted by regulators, the World Health  
272 Organisation, and in the vaccines' summaries of product characteristics (SmPC) suggest that  
273 myocarditis and pericarditis are very rare, occurring in less than one in 10,000 vaccine doses  
274 administered (2, 5-7, 11). Our calculated reporting rates for myocarditis and pericarditis following  
275 mRNA vaccines in each of the UK, US, and EU/EEA were consistent with this. However, underreporting  
276 of the events to regulators is possible, therefore it may be that the events of myocarditis and  
277 pericarditis are 'rare' events (more frequent than 1/10,000) rather than 'very rare' (less frequent than  
278 1/10,000) events as suggested. Conversely greater reporting may have occurred due to the public  
279 interest in adverse reactions linked with COVID-19 vaccines, thus analysis of multiple data sources was  
280 used here to overcome these potential limitations. In October 2021, the Pharmacovigilance Risk  
281 Assessment Committee (PRAC) of the European Medicines Agency announced a plan to review the  
282 risk of myocarditis and pericarditis following mRNA vaccines (29). It is therefore possible that updates  
283 to the vaccines' SmPC will be required once this review is complete.



284 When examining the demographics of vaccinees who had reported myocarditis or pericarditis  
285 following mRNA vaccines, both events appear to more commonly affect males compared with  
286 females, particularly amongst vaccinees of younger age categories (Tables 2-4). This is consistent with  
287 early reports surrounding these events, where it was suggested that younger males appear at higher  
288 risk of myocarditis and pericarditis following mRNA vaccines (1). Demographic data was available for  
289 VAERS and EudraVigilance populations separated by myocarditis and pericarditis; in these databases  
290 results were similar with more than 70% of myocarditis and more than 50% of pericarditis events  
291 reported in males (Tables 2 and 4). These results are consistent with results of  
292 pharmacoepidemiological studies in the published literature; in the studies where sex was reported,  
293 more than 60% of patients were male (Table 5) (30-35). This is an interesting finding, as it has been  
294 previously suggested that over 70% of reports to VAERS involve females (31). It is possible that the  
295 event was missed or misclassification occurred in older adults, particularly in older individuals in the  
296 three populations of interest who were vaccinated prior to the signal emerging. It is also possible that  
297 some of the symptoms of myocarditis and pericarditis, for example chest pain and breathlessness,  
298 were attributed to other cardio-respiratory conditions in older people. Nonetheless, it is known that  
299 most cases of myocarditis (any cause) occur in young adults, with males more commonly affected than  
300 females; this supports the results observed in this study (36, 37). Alternatively, vaccine roll-out in each  
301 of the regions may have affected the results observed in some of the countries, including availability  
302 of different vaccines and corresponding age distributions of those receiving each vaccine in different  
303 regions; for instance in the UK, mRNA vaccines were more frequently used in younger age groups,  
304 while older vaccinees may have been more likely to receive an adenovirus vector vaccine.

305 We appreciate that there will be regional differences in COVID-19 strains as well as endemic viruses  
306 circulating in the populations, and these may have been the underlying cause of myocarditis and  
307 pericarditis in the reporting populations examined. However, it is not possible to identify or quantify  
308 these in spontaneously reported data. In order to overcome these differences, we have analysed data  
309 from three different spontaneous reporting systems and worldwide data from the literature to  
310 identify trends in this very rare event. As this is a very rare event with small numbers of people  
311 affected, it is important to bring together data from around the world to identify trends that may not  
312 be seen within one population. Further analysis is required in discrete populations, if appropriate, to  
313 better stratify patients, aiding classification of groups according to risk factors for adverse events  
314 following vaccination.

315 Data on vaccine dose were only available from the VAERS database. Most cases reported to VAERS  
316 followed a second dose of vaccine (Tables 3a and 3b). This is consistent with the early signal which  
317 emerged in Israel, where 121 of the 148 reported cases of myocarditis occurred around the time of  
318 the second dose of COVID-19 vaccine (1). Furthermore, similar results were observed by Hajjo et al.,  
319 who found only a very small number of events occurring after a third dose in their analysis of VAERS  
320 data (38).

321 Pharmacoepidemiological studies identified by systematic review (Table 5) were consistent with  
322 results found in spontaneously data from VAERS and EudraVigilance (Tables 2-5). Young males more  
323 frequently reported myocarditis in each of these studies and found in our analysis of spontaneous  
324 reporting data. Furthermore, reports were more frequent following a second dose of mRNA vaccine,  
325 although time intervals between doses was not specified and may also differ between regions.  
326 Therefore incorporation of the evidence on dosing effects from the VAERS system and the literature  
327 indicated that following the second dose was when the most myocarditis and pericarditis events  
328 occurred. Continuous monitoring of this will be required, especially following subsequent doses of  
329 mRNA vaccines.

330 Myocarditis has been observed historically following vaccination, including after smallpox, influenza,  
331 and hepatitis B vaccines; prior to COVID-19 0.1% of reports to VAERS between 1990 and 2018 had  
332 been in relation to myopericarditis (13). Furthermore, myocarditis is known to occur after a range of  
333 viral infections, including coronaviruses which cause Middle East Respiratory Syndrome (MERS) and  
334 COVID-19, with viral infection the most common cause of myocarditis (39-41). This study provides  
335 evidence that younger vaccinees more frequently report myocarditis and pericarditis following mRNA  
336 COVID-19 vaccines compared with older vaccinees, and reports are more frequent following the  
337 second dose. Results were consistent between each of the three data sources used. This is an  
338 important finding, because as vaccination programmes around the world progress, rates of  
339 myocarditis and pericarditis are likely to increase. The effect of booster vaccinations with mRNA  
340 COVID-19 vaccines on the development of myocarditis and pericarditis is largely unknown.  
341 Furthermore, mRNA COVID-19 vaccines (particularly Spikevax) are being supplied to the COVAX  
342 initiative for distribution throughout low- and middle-income countries, where diagnostic imaging and  
343 access to healthcare is more difficult (42, 43). Regulatory authorities should continue to monitor the  
344 effects that mRNA vaccination might have on the heart in the populations for which they are  
345 responsible. The proportions of young people are higher in low- and middle-income countries'  
346 populations compared to high income countries. Issuing diagnostic criteria and treatment protocols  
347 for myocarditis and pericarditis with mRNA COVID-19 vaccines that take into consideration the  
348 capabilities of the local healthcare system are also important.

#### 349 4.1 Limitations

350 Vaccination policies in the three regions may have biased the results towards a higher number of  
351 adverse events reports myocarditis and pericarditis from younger vaccinees compared with older  
352 vaccinees. In each of these regions, younger people were more likely to have received mRNA vaccines,  
353 which may have contributed to higher reporting rates of myocarditis and pericarditis in younger  
354 vaccinees. The frequency of reported events per age group was presented as a crude number, and  
355 reporting rates could only be calculated as an overall estimate rather than stratified by age; based on  
356 the data available for vaccinations administered, it was not possible to determine the proportion of  
357 all vaccinees per age group who reported an event of myocarditis or pericarditis. This is very  
358 important, because it is likely that the reporting rate of myocarditis and pericarditis with mRNA COVID-  
359 19 vaccines will be higher in young people and even higher in young men if the reporting rates are  
360 stratified by age and sex. The regulatory authorities and Marketing Authorisations Holders (MAHs)  
361 need to follow up reports of these conditions with reporters to obtain as much information and make  
362 this information available publicly. Myocarditis and pericarditis following mRNA COVID-19 vaccines is  
363 an area which requires further research.

364 The data sources for this study were spontaneous reporting systems of the UK, US, and EEA. All  
365 spontaneous reporting systems have well-known limitations including missing information, and  
366 reporting bias caused by publicity surrounding a particular adverse event (44). Misclassification of  
367 myocarditis and pericarditis, or differing definitions of these events between the regions analysed, is  
368 also possible particularly before these events attracted publicity or among older age groups. The  
369 definition and diagnosis of "Myocarditis" and "Pericarditis" are based on the reporters' statements,  
370 and are not usually validated by the regulatory authority receiving the report. Under-reporting is a  
371 major limitation of spontaneous reporting; even with the intense publicity and global attention on  
372 COVID-19 vaccine safety, it is possible that not all cases are reported to regulatory authorities (45, 46).  
373 Furthermore, a report to spontaneous reporting systems indicates suspicion that the event was  
374 associated with the vaccine, it does not confirm that the vaccine caused the event (11, 44). Further

375 assessment is required to determine causality for each report. Finally, it is not possible to estimate  
376 incidence rates using spontaneous reports, and there is no unvaccinated comparison group (44).

377 Using publicly available data introduced some challenges, as the level of detail available was limited  
378 and varied between data sources. Data on the vaccine dose on which the reported events of  
379 myocarditis and pericarditis occurred were only available for the US VAERS population. Information  
380 contained within individual reports is not routinely made available, however these comprise  
381 important clinical information that would allow better understanding of each case. Such details should  
382 be made publicly available. Better transparency is needed to allow more robust research using  
383 spontaneous reporting to be undertaken.

384 Due to the limited published research into myocarditis and pericarditis following mRNA COVID-19  
385 vaccines, we included all pharmacoepidemiological study designs (except case reports and case series)  
386 and considered all study populations and all study periods for inclusion. The purpose of systematically  
387 reviewing the literature was to determine whether results from our analyses of spontaneous reports  
388 were consistent with other evidence currently available. Due to the short time period since vaccine  
389 programmes were initiated and the heterogenous nature (regional differences, age, sex, and disease  
390 status of participants) of the included studies, no pooling of data, syntheses, or meta-analyses could  
391 be completed. It should be noted that there were no formal assessments of publication bias during  
392 the systematic literature review. However, a CASP checklist was completed for each included study,  
393 which deemed the research to be of sufficient quality for inclusion. Nonetheless, each study had  
394 limitations which should be considered when interpreting their results. The possibility of publication  
395 bias was not formally analysed.

396 Further pharmacoepidemiological studies are urgently needed to address many of the limitations of  
397 spontaneous reporting in understanding myocarditis and pericarditis following mRNA COVID-19  
398 vaccines including more accurate estimates of the frequency, better understanding of the clinical  
399 course and the effects of these events on quality of life. It is also important to compare the incidence  
400 and characteristics of these events with recipients of other non-mRNA COVID-19 vaccines and  
401 unvaccinated people. However, these studies will take time to be conducted.

## 402 5.0 Conclusions

403 This study adds to existing evidence that younger vaccinees more frequently report myocarditis and  
404 pericarditis following mRNA COVID-19 vaccines compared with older vaccinees, and reports are more  
405 frequent following the second dose. These events are very rare or possibly rare according to the  
406 estimated reporting rates from spontaneous adverse reactions. The events were more frequently  
407 reported amongst males, and most reports came from vaccinees aged under 30 years. The clinical  
408 course of these events is typically mild, with full recovery in most cases.

409 The study brings together spontaneously reported adverse event data from three regions.  
410 Consistencies in the reporting rates and trends of myocarditis and pericarditis within the three data  
411 sources utilised suggest that results may be generalisable to other populations in which mRNA  
412 vaccines are used. However, limitations of the data sources used and biases which may have affected  
413 results should be considered. It is important that regulatory authorities continue to monitor the  
414 effects of mRNA vaccines on the heart, particularly as vaccine programmes progress to include  
415 younger vaccinees in many parts of the world. Myocarditis and pericarditis following mRNA COVID-19  
416 vaccines is an area which requires further research, especially in children and adolescents and  
417 following third and subsequent (booster) doses. Pharmacoepidemiological studies are urgently  
418 needed to address many of the limitations of spontaneous reporting in understanding myocarditis and

419 pericarditis following mRNA COVID-19 vaccines including more accurate estimates of frequency, a  
420 better understanding of the clinical course, and the effects on quality of life. However, they will take  
421 time to be conducted. We believe that the data we describe here will enhance the understanding of  
422 these conditions and help with identification of potential sources of mechanisms of vaccine-associated  
423 myocarditis and pericarditis by identifying which populations are most likely to suffer these adverse  
424 events following COVID-19 mRNA vaccination.

425

426

427 6.0 References

428

- 429 1. Surveillance of Myocarditis (Inflammation of the Heart Muscle) Cases Between December  
430 2020 and May 2021 (Including) [press release]. 02 June 2021.
- 431 2. COVID-19 subcommittee of the WHO Global Advisory Committee on Vaccine Safety (GACVS):  
432 updated guidance regarding myocarditis and pericarditis reported with COVID-19 mRNA vaccines  
433 [press release]. 09 July 2021.
- 434 3. BioNTech-Pfizer. Comirnaty concentrate for dispersion for injection COVID-19 mRNA Vaccine  
435 (nucleoside modified) 2021 [updated 22 July 2021. Available from:  
436 <https://www.medicines.org.uk/emc/product/12740/smpc>.
- 437 4. European Medicines Agency. Spikevax (previously COVID-19 Vaccine Moderna): EPAR -  
438 Product information. 2021.
- 439 5. European Medicines Agency. Comirnaty: EPAR - Product Information. 2021.
- 440 6. Medicines & Healthcare products Regulatory Agency. Summary of Product Characteristics for  
441 COVID-19 Vaccine Moderna 2021 [updated 25 June. Available from:  
442 [https://www.gov.uk/government/publications/regulatory-approval-of-covid-19-vaccine-  
443 moderna/information-for-healthcare-professionals-on-covid-19-vaccine-moderna](https://www.gov.uk/government/publications/regulatory-approval-of-covid-19-vaccine-moderna/information-for-healthcare-professionals-on-covid-19-vaccine-moderna).
- 444 7. Medicines & Healthcare products Regulatory Agency. Summary of Product Characteristics for  
445 COVID-19 Vaccine Pfizer/BioNTech 2021 [updated 11 August 2021. Available from:  
446 [https://www.gov.uk/government/publications/regulatory-approval-of-pfizer-biontech-vaccine-for-  
447 covid-19/summary-of-product-characteristics-for-covid-19-vaccine-pfizerbiontech](https://www.gov.uk/government/publications/regulatory-approval-of-pfizer-biontech-vaccine-for-covid-19/summary-of-product-characteristics-for-covid-19-vaccine-pfizerbiontech).
- 448 8. U.S. Food and Drug Administration (FDA). Fact sheet for healthcare providers administering  
449 vaccine (vaccination providers) Emergency Use Authorization (EUA) Of The Pfizer-BioNTech COVID-19  
450 Vaccine To Prevent Coronavirus Disease 2019 (COVID-19). 2021.
- 451 9. U.S. Food and Drug Administration (FDA). Fact sheet for healthcare providers administering  
452 vaccine (vaccination providers) Emergency Use Authorization (EUA) of the Moderna COVID-19 Vaccine  
453 to prevent coronavirus disease 2019 (COVID-19). 2021.
- 454 10. COVID-19 mRNA Vaccines Comirnaty and Spikevax: risk of myocarditis and pericarditis [press  
455 release]. 19 July 2021.
- 456 11. Medicines & Healthcare products Regulatory Agency. Coronavirus vaccine - weekly summary  
457 of Yellow Card reporting 2021 [Available from:  
458 [https://www.gov.uk/government/publications/coronavirus-covid-19-vaccine-adverse-  
459 reactions/coronavirus-vaccine-summary-of-yellow-card-reporting](https://www.gov.uk/government/publications/coronavirus-covid-19-vaccine-adverse-reactions/coronavirus-vaccine-summary-of-yellow-card-reporting).
- 460 12. Hause AM, Gee J, Baggs J, Abara WE, Marquez P, Thompson D, et al. COVID-19 Vaccine Safety  
461 in Adolescents Aged 12-17 Years - United States, December 14, 2020-July 16, 2021. MMWR Morbidity  
462 and mortality weekly report. 2021;70(31):1053-8.
- 463 13. Bozkurt B, Kamat I, Hotez PJ. Myocarditis With COVID-19 mRNA Vaccines. Circulation.  
464 2021;144(6):471-84.
- 465 14. Willame C, Dodd C, Gini R, Duran-Salinas C, Ehrenstein V, Thomsen RM, et al. Background rates  
466 of Adverse Events of Special Interest for monitoring COVID-19 vaccine March 2021 [Available from:  
467 [http://www.encepp.eu/phact\\_links.shtml](http://www.encepp.eu/phact_links.shtml).
- 468 15. Jenco M. CDC confirms 226 cases of myocarditis after COVID-19 vaccination in people 30 and  
469 under. AAP News. 2021 10 June 2021.
- 470 16. U.S. Food and Drug Administration (FDA). Spikevax and Moderna COVID-19 Vaccine 2022  
471 [Available from: [https://www.fda.gov/emergency-preparedness-and-response/coronavirus-disease-  
472 2019-covid-19/spikevax-and-moderna-covid-19-vaccine](https://www.fda.gov/emergency-preparedness-and-response/coronavirus-disease-2019-covid-19/spikevax-and-moderna-covid-19-vaccine).
- 473 17. U.S. Food and Drug Administration (FDA). Comirnaty and Pfizer-BioNTech COVID-19 Vaccine  
474 [Available from: [https://www.fda.gov/emergency-preparedness-and-response/coronavirus-disease-  
475 2019-covid-19/comirnaty-and-pfizer-biontech-covid-19-vaccine#additional](https://www.fda.gov/emergency-preparedness-and-response/coronavirus-disease-2019-covid-19/comirnaty-and-pfizer-biontech-covid-19-vaccine#additional).

- 476 18. European Medicines Agency. EudraVigilance - European Database of Suspected Adverse Drug  
477 Reaction Reports. 2021.
- 478 19. Medicines & Healthcare products Regulatory Agency. COVID-19 Moderna Vaccine Analysis  
479 Print. 2021.
- 480 20. United States Department of Health and Human Services, Department of Health and Human  
481 Services (DHHS), Public Health Service (PHS), (CDC) FaDAFCfDC. CDC WONDER Online Database. 1990  
482 - Last Friday.
- 483 21. Centers for Disease Prevention and Control. COVID Data Tracker COVID-19 Vaccinations in the  
484 United States 2021 [updated 21 October 2021. Available from: [https://covid.cdc.gov/covid-data-  
485 tracker/#vaccinations\\_vacc-total-admin-rate-total](https://covid.cdc.gov/covid-data-tracker/#vaccinations_vacc-total-admin-rate-total).
- 486 22. European Centre for Disease Prevention and Control. Data on COVID-19 vaccination in the  
487 EU/EEA 2021 [Available from: [https://www.ecdc.europa.eu/en/publications-data/data-covid-19-  
488 vaccination-eu-eea](https://www.ecdc.europa.eu/en/publications-data/data-covid-19-vaccination-eu-eea).
- 489 23. National Institute for Health and Care Excellence. Adverse reactions to drugs [Available from:  
490 [https://bnf.nice.org.uk/guidance/adverse-reactions-to-  
491 drugs.html#:~:text=Rare,Frequency%20not%20known](https://bnf.nice.org.uk/guidance/adverse-reactions-to-drugs.html#:~:text=Rare,Frequency%20not%20known).
- 492 24. Chouchana L, Blet A, Al-Khalaf M, Kafil TS, Nair G, Robblee J, et al. Features of Inflammatory  
493 Heart Reactions Following mRNA COVID-19 Vaccination at a Global Level. *Clinical pharmacology and  
494 therapeutics*. 2022;111(3):605-13.
- 495 25. Farahmand R, Trottier CA, Kannam JP, Ho KKL. Incidence of Myopericarditis and Myocardial  
496 Injury in Coronavirus Disease 2019 Vaccinated Subjects. *The American journal of cardiology*.  
497 2022;164:123-30.
- 498 26. Jain SS, Steele JM, Fonseca B, Huang S, Shah S, Maskatia SA, et al. COVID-19 Vaccination-  
499 Associated Myocarditis in Adolescents. *Pediatrics*. 2021;148(5).
- 500 27. Klein NP, Lewis N, Goddard K, Fireman B, Zerbo O, Hanson KE, et al. Surveillance for Adverse  
501 Events After COVID-19 mRNA Vaccination. *Jama*. 2021;326(14):1390-9.
- 502 28. Li X, Lai FTT, Chua GT, Kwan MYW, Lau YL, Ip P, et al. Myocarditis Following COVID-19  
503 BNT162b2 Vaccination Among Adolescents in Hong Kong. *JAMA pediatrics*. 2022.
- 504 29. European Medicines Agency. Meeting highlights from the Pharmacovigilance Risk Assessment  
505 Committee (PRAC) 25-28 October 2021 2021 [updated 29 October 2021. Available from:  
506 [https://www.ema.europa.eu/en/news/meeting-highlights-pharmacovigilance-risk-assessment-  
507 committee-prac-25-28-october-2021](https://www.ema.europa.eu/en/news/meeting-highlights-pharmacovigilance-risk-assessment-committee-prac-25-28-october-2021).
- 508 30. Mevorach D, Anis E, Cedar N, Bromberg M, Haas EJ, Nadir E, et al. Myocarditis after BNT162b2  
509 mRNA Vaccine against Covid-19 in Israel. *The New England journal of medicine*. 2021.
- 510 31. Rose J, McCullough PA. A Report on Myocarditis Adverse Events in the U.S. Vaccine Adverse  
511 Events Reporting System (VAERS) in Association with COVID-19 Injectable Biological Products. *Current  
512 problems in cardiology*. 2021:101011.
- 513 32. Schauer J, Buddhe S, Colyer J, Sagiv E, Law Y, Chikkabyrappa SM, et al. Myopericarditis after  
514 the Pfizer mRNA COVID-19 Vaccine in Adolescents. *The Journal of pediatrics*. 2021.
- 515 33. Schneider J, Sottmann L, Greinacher A, Hagen M, Kasper HU, Kuhnen C, et al. Postmortem  
516 investigation of fatalities following vaccination with COVID-19 vaccines. *International journal of legal  
517 medicine*. 2021:1-11.
- 518 34. Simone A, Herald J, Chen A, Gulati N, Shen AY, Lewin B, et al. Acute Myocarditis Following  
519 COVID-19 mRNA Vaccination in Adults Aged 18 Years or Older. *JAMA internal medicine*. 2021.
- 520 35. Starekova J, Bluemke DA, Bradham WS, Grist TM, Schiebler ML, Reeder SB. Myocarditis  
521 Associated with mRNA COVID-19 Vaccination. *Radiology*. 2021:211430.
- 522 36. National Organisation for Rare Disorders. Myocarditis 2015 [Available from:  
523 <https://rarediseases.org/rare-diseases/myocarditis/>.
- 524 37. Golpour A, Patriki D, Hanson PJ, McManus B, Heidecker B. Epidemiological Impact of  
525 Myocarditis. *J Clin Med*. 2021;10(4):603.

- 526 38. Hajjo R, Sabbah DA, Bardaweel SK, Tropsha A. Shedding the Light on Post-Vaccine Myocarditis  
527 and Pericarditis in COVID-19 and Non-COVID-19 Vaccine Recipients. *Vaccines*. 2021;9(10).
- 528 39. Bajaj R, Sinclair HC, Patel K, Low B, Pericao A, Manisty C, et al. Delayed-onset myocarditis  
529 following COVID-19. *The Lancet Respiratory Medicine*. 2021;9(4):e32-e4.
- 530 40. Siripanthong B, Nazarian S, Muser D, Deo R, Santangeli P, Khanji MY, et al. Recognizing COVID-  
531 19-related myocarditis: The possible pathophysiology and proposed guideline for diagnosis and  
532 management. *Heart Rhythm*. 2020;17(9):1463-71.
- 533 41. Arbustini E, Narula N, Giuliani L, Di Toro A. Genetic Basis of Myocarditis: Myth or Reality?  
534 Myocarditis. 2020:45-89.
- 535 42. Gavi signs agreement with Moderna to secure doses on behalf of COVAX Facility [press  
536 release]. 3 May 2021 2021.
- 537 43. Pfizer and BioNTech reach agreement with COVAX for advance purchase of vaccine to help  
538 combat COVID-19 [press release]. 22 January 2021 2021.
- 539 44. Centers for Disease Prevention and Control. Vaccine Adverse Event Reporting System (VAERS)  
540 2021 [updated 2 July 2021. Available from:  
541 <https://wonder.cdc.gov/wonder/help/vaers.html#Additional>.
- 542 45. Montgomery J, Ryan M, Engler R, Hoffman D, McClenathan B, Collins L, et al. Myocarditis  
543 Following Immunization With mRNA COVID-19 Vaccines in Members of the US Military. *JAMA*  
544 *Cardiology*. 2021.
- 545 46. Hazell L, Shakir SA. Under-reporting of adverse drug reactions : a systematic review. *Drug*  
546 *safety*. 2006;29(5):385-96.
- 547 47. Barda N, Dagan N, Ben-Shlomo Y, Kepten E, Waxman J, Ohana R, et al. Safety of the BNT162b2  
548 mRNA Covid-19 vaccine in a nationwide setting. *New England Journal of Medicine*.  
549 2021;385(12):1078-90.
- 550 48. Chua GT, Kwan MYW, Chui CSL, Smith RD, Cheung EC, Tian T, et al. Epidemiology of Acute  
551 Myocarditis/Pericarditis in Hong Kong Adolescents Following Comirnaty Vaccination. *Clinical*  
552 *infectious diseases : an official publication of the Infectious Diseases Society of America*. 2021.
- 553 49. Das BB, Kohli U, Ramachandran P, Nguyen HH, Greil G, Hussain T, et al. Myopericarditis after  
554 messenger RNA Coronavirus Disease 2019 Vaccination in Adolescents 12 to 18 Years of Age. *The*  
555 *Journal of pediatrics*. 2021;238:26-32.e1.
- 556 50. Diaz GA, Parsons GT, Gering SK, Meier AR, Hutchinson IV, Robicsek A. Myocarditis and  
557 Pericarditis After Vaccination for COVID-19. *Jama*. 2021;326(12):1210-2.
- 558 51. Eggebrecht H, Breitbart P, Koch A, Nowak B, Walther C, Voigtländer T, et al. Trends in  
559 ambulatory cardiology consultations for suspected myocarditis after COVID-19 vaccination. *Clinical*  
560 *research in cardiology : official journal of the German Cardiac Society*. 2022;111(2):237-9.
- 561 52. Foltran D, Delmas C, Flumian C, De Paoli P, Salvo F, Gautier S, et al. Myocarditis and pericarditis  
562 in adolescents after first and second doses of mRNA COVID-19 vaccines. *European heart journal*  
563 *Quality of care & clinical outcomes*. 2022;8(2):99-103.
- 564 53. Fronza M, Thavendiranathan P, Chan V, Karur GR, Udell JA, Wald RM, et al. Myocardial Injury  
565 Pattern at MRI in COVID-19 Vaccine-associated Myocarditis. *Radiology*. 2022:212559.
- 566 54. Gargano JW, Wallace M, Hadler SC, Langley G, Su JR, Oster ME, et al. Use of mRNA COVID-19  
567 Vaccine After Reports of Myocarditis Among Vaccine Recipients: Update from the Advisory Committee  
568 on Immunization Practices - United States, June 2021. *MMWR Morbidity and mortality weekly report*.  
569 2021;70(27):977-82.
- 570 55. Golino M, Licciardello C, Matteo F, Giovenzana FLF, Franzosi C, Blasi F, et al. Myopericarditis  
571 after SARS-CoV-2 MRNA vaccination: Casual or causal relationship? *European Heart Journal,*  
572 *Supplement*. 2021;23(SUPPL G):G92.
- 573 56. Husby A, Hansen JV, Fosbøl E, Thiesson EM, Madsen M, Thomsen RW, et al. SARS-CoV-2  
574 vaccination and myocarditis or myopericarditis: population based cohort study. *BMJ (Clinical research*  
575 *ed)*. 2021;375:e068665.

- 576 57. Kerneis M, Bihan K, Salem J-E. COVID-19 vaccines and myocarditis. *Archives of Cardiovascular*  
577 *Diseases*. 2021;114(6-7):515-7.
- 578 58. Knowlton KU, Knight S, Muhlestein JB, Le VT, Horne BD, May HT, et al. A small but significant  
579 increased incidence of acute pericarditis identified after vaccination for sarscov-2. *Circulation*.  
580 2021;144(SUPPL 1).
- 581 59. Kravchenko D, Isaak A, Mesropyan N, Endler C, Bischoff L, Vollbrecht T, et al. Cardiac MRI in  
582 Suspected Acute Myocarditis After COVID-19 mRNA Vaccination. *RoFo : Fortschritte auf dem Gebiete*  
583 *der Rontgenstrahlen und der Nuklearmedizin*. 2022.
- 584 60. Lai FTT, Li X, Peng K, Huang L, Ip P, Tong X, et al. Carditis After COVID-19 Vaccination With a  
585 Messenger RNA Vaccine and an Inactivated Virus Vaccine : A Case-Control Study. *Annals of internal*  
586 *medicine*. 2022;175(3):362-70.
- 587 61. Mevorach D, Anis E, Cedar N, Bromberg M, Haas EJ, Nadir E, et al. Myocarditis after BNT162b2  
588 mRNA Vaccine against Covid-19 in Israel. *The New England journal of medicine*. 2021;385(23):2140-9.
- 589 62. Nygaard U, Holm M, Bohnstedt C, Chai Q, Schmidt LS, Hartling UB, et al. Population-based  
590 Incidence of Myopericarditis After COVID-19 Vaccination in Danish Adolescents. *The Pediatric*  
591 *infectious disease journal*. 2022;41(1):e25-e8.
- 592 63. Oh TH, Woo SH, Hong S, Lee C, Lee WJ, Jeong SK. Clinical Features of Patients Presenting to  
593 the Emergency Department With Cardiovascular Adverse Reactions After COVID-19 mRNA  
594 Vaccination. *Journal of Korean medical science*. 2022;37(9):e73.
- 595 64. Oster ME, Shay DK, Su JR, Gee J, Creech CB, Broder KR, et al. Myocarditis Cases Reported After  
596 mRNA-Based COVID-19 Vaccination in the US From December 2020 to August 2021. *Jama*.  
597 2022;327(4):331-40.
- 598 65. Patone M, Mei XW, Handunnetthi L, Dixon S, Zaccardi F, Shankar-Hari M, et al. Risks of  
599 myocarditis, pericarditis, and cardiac arrhythmias associated with COVID-19 vaccination or SARS-CoV-  
600 2 infection. *Nature medicine*. 2022;28(2):410-22.
- 601 66. Sa S, Lee CW, Shim SR, Yoo H, Choi J, Kim JH, et al. The Safety of mRNA-1273, BNT162b2 and  
602 JNJ-78436735 COVID-19 Vaccines: Safety Monitoring for Adverse Events Using Real-World Data.  
603 *Vaccines*. 2022;10(2).
- 604 67. Simone A, Herald J, Chen A, Gulati N, Shen AY, Lewin B, et al. Acute Myocarditis Following  
605 COVID-19 mRNA Vaccination in Adults Aged 18 Years or Older. *JAMA internal medicine*.  
606 2021;181(12):1668-70.
- 607 68. Truong DT, Dionne A, Muniz JC, McHugh KE, Portman MA, Lambert LM, et al. Clinically  
608 Suspected Myocarditis Temporally Related to COVID-19 Vaccination in Adolescents and Young Adults:  
609 Suspected Myocarditis After COVID-19 Vaccination. *Circulation*. 2022;145(5):345-56.
- 610 69. Tsun Lai FTP, Chua GM, Wa Chan EM, Huang LM, Wah Kwan MYM, Ma TP, et al. Adverse Events  
611 of Special Interest Following the Use of BNT162b2 in Adolescents: A Population-Based Retrospective  
612 Cohort Study. *Emerging microbes & infections*. 2022:1-17.
- 613 70. Witberg G, Barda N, Hoss S, Richter I, Wiessman M, Aviv Y, et al. Myocarditis after Covid-19  
614 Vaccination in a Large Health Care Organization. *The New England journal of medicine*.  
615 2021;385(23):2132-9.
- 616 71. Yap J, Tham MY, Poh J, Toh D, Chan CL, Lim TW, et al. Pericarditis and myocarditis after COVID-  
617 19 mRNA vaccination in a nationwide setting. *Annals of the Academy of Medicine, Singapore*.  
618 2022;51(2):96-100.

619

620

621



622 7.0 Figure Legends

623

624

625 **Figure 1: Flowchart detailing inclusion of studies for systematic review**

626 Literature searches were carried out in PubMed/MEDLINE and simultaneously in Embase. The  
627 identified records were de-duplicated prior to screening to remove duplicate publications. Records  
628 were then screened to remove literature that did not meet the search criteria and eligibility was  
629 assessed prior to inclusion into the literature review.

630

631 **Figure 2: Event counts and reporting rates of myocarditis and pericarditis in the UK, US and EU**

632 (A) Events of myocarditis and pericarditis reported to the Yellow Card scheme (UK), VAERS (US) and  
633 EudraVigilance (EU) reporting systems following any dose of COVID-19 mRNA vaccines separated by  
634 vaccine manufacturer combined to give total counts. (B) Reporting rates of myocarditis and  
635 pericarditis following any dose of COVID-19 mRNA vaccine separated by vaccine manufacturer and  
636 reporting region.

637

638 **Figure 3: Myocarditis and pericarditis reports separated by gender**

639 (A) Percentage of males and females experiencing myocarditis and pericarditis reported to each  
640 reporting system (Yellow Card, VAERS and EudraVigilance). Bars represent the total of all myocarditis  
641 and pericarditis reports to each system, separated by gender, where bars do not meet 100% indicates  
642 reports where gender was not specified. Values indicate the percentage of males experiencing these  
643 events. (B) Reports in each region were stratified by vaccine manufacturer as well as gender  
644 experiencing these events. Stacked bars represent the total number of reports, where gender was  
645 specified, from each region for each vaccine type. Values depict the percentage of males that  
646 experienced these events.

647

648 **Figure 4: Myocarditis and pericarditis events following COVID-19 mRNA vaccination separated by  
649 dose**

650 Data from the VAERS (US) reporting system was separated by reaction type; myocarditis (A) and  
651 pericarditis (B), vaccine manufacturer and by dose received. Stacked bars represent the male and  
652 female reports of each condition according to the dose received.

Table 1: Reports of myocarditis and pericarditis submitted to Yellow Card scheme, by age and sex. Datalock point 16 March 2022.

|                          | Comirnaty   |               | Spikevax   |               | Total       |               |
|--------------------------|-------------|---------------|------------|---------------|-------------|---------------|
|                          | n           | %             | n          | %             | n           | %             |
| <b>Age group (years)</b> |             |               |            |               |             |               |
| <18 Years                | 70          | 5.68          | 0          | 0.00          | 70          | 4.50          |
| 18-29 Years              | 372         | 30.19         | 114        | 35.19         | 486         | 31.23         |
| 30-39 Years              | 299         | 24.27         | 92         | 28.40         | 391         | 25.13         |
| 40-49 Years              | 137         | 11.12         | 48         | 14.81         | 185         | 11.89         |
| 50-59 Years              | 92          | 7.47          | 22         | 6.79          | 114         | 7.33          |
| 60+ Years                | 146         | 11.85         | 15         | 4.63          | 161         | 10.35         |
| Age not specified        | 144         | 11.69         | 34         | 10.49         | 178         | 11.44         |
| <b>Sex</b>               |             |               |            |               |             |               |
| Female                   | 492         | 39.94         | 109        | 33.64         | 601         | 38.62         |
| Male                     | 731         | 59.33         | 206        | 63.58         | 937         | 60.22         |
| Sex not specified        | 37          | 3.00          | 10         | 3.09          | 47          | 3.02          |
| <b>Total</b>             | <b>1260</b> | <b>100.00</b> | <b>325</b> | <b>100.00</b> | <b>1585</b> | <b>100.00</b> |

Table 2: Myocarditis and pericarditis events reported to VAERS overall. Datalock point 14 March 2022. Percentages per age group are presented.

| Age Group                         | Myocarditis |               |            |               |                   |               |             |               | Pericarditis |               |            |               |                   |               |             |               |
|-----------------------------------|-------------|---------------|------------|---------------|-------------------|---------------|-------------|---------------|--------------|---------------|------------|---------------|-------------------|---------------|-------------|---------------|
|                                   | Male        |               | Female     |               | Sex Not Specified |               | Total       |               | Male         |               | Female     |               | Sex Not Specified |               | Total       |               |
|                                   | n           | %             | n          | %             | n                 | %             | n           | %             | n            | %             | n          | %             | n                 | %             | N           | %             |
| <b>Comirnaty (PfizerBioNTech)</b> |             |               |            |               |                   |               |             |               |              |               |            |               |                   |               |             |               |
| <6 months                         | 0           | 0.00          | 0          | 0.00          | 0                 | 0.00          | 0           | 0.00          | 0            | 0.00          | 1          | 0.23          | 0                 | 0.00          | 1           | 0.09          |
| 3-5 Years                         | 2           | 0.15          | 0          | 0.00          | 0                 | 0.00          | 2           | 0.11          | 1            | 0.14          | 0          | 0.00          | 0                 | 0.00          | 1           | 0.09          |
| 6-17 Years                        | 525         | 38.80         | 67         | 15.44         | 2                 | 5.41          | 594         | 32.57         | 145          | 20.14         | 23         | 5.32          | 1                 | 10.00         | 169         | 14.54         |
| 18-29 Years                       | 404         | 29.86         | 102        | 23.50         | 1                 | 2.70          | 507         | 27.80         | 217          | 30.14         | 51         | 11.81         | 0                 | 0.00          | 268         | 23.06         |
| 30-39 Years                       | 157         | 11.60         | 69         | 15.90         | 2                 | 5.41          | 228         | 12.50         | 116          | 16.11         | 78         | 18.06         | 0                 | 0.00          | 194         | 16.70         |
| 40-49 Years                       | 68          | 5.03          | 59         | 13.59         | 0                 | 0.00          | 127         | 6.96          | 56           | 7.78          | 83         | 19.21         | 0                 | 0.00          | 139         | 11.96         |
| 50-59 Years                       | 41          | 3.03          | 56         | 12.90         | 0                 | 0.00          | 97          | 5.32          | 64           | 8.89          | 73         | 16.90         | 0                 | 0.00          | 137         | 11.79         |
| 60-64 Years                       | 13          | 0.96          | 21         | 4.84          | 2                 | 5.41          | 36          | 1.97          | 20           | 2.78          | 43         | 9.95          | 0                 | 0.00          | 63          | 5.42          |
| 65-79 Years                       | 52          | 3.84          | 31         | 7.14          | 2                 | 5.41          | 85          | 4.66          | 67           | 9.31          | 50         | 11.57         | 2                 | 20.00         | 119         | 10.24         |
| 80+ Years                         | 5           | 0.37          | 4          | 0.92          | 0                 | 0.00          | 9           | 0.49          | 12           | 1.67          | 9          | 2.08          | 0                 | 0.00          | 21          | 1.81          |
| Not Specified                     | 86          | 6.36          | 25         | 5.76          | 28                | 75.68         | 139         | 7.62          | 22           | 3.06          | 21         | 4.86          | 7                 | 70.00         | 50          | 4.30          |
| <b>Total</b>                      | <b>1353</b> | <b>100.00</b> | <b>434</b> | <b>100.00</b> | <b>37</b>         | <b>100.00</b> | <b>1824</b> | <b>100.00</b> | <b>720</b>   | <b>100.00</b> | <b>432</b> | <b>100.00</b> | <b>10</b>         | <b>100.00</b> | <b>1162</b> | <b>100.00</b> |
| <b>Spikevax (Moderna)</b>         |             |               |            |               |                   |               |             |               |              |               |            |               |                   |               |             |               |
| <6 months                         | 0           | 0.00          | 0          | 0.00          | 0                 | 0.00          | 0           | 0.00          | 0            | 0.00          | 0          | 0.00          | 0                 | 0.00          | 0           | 0.00          |
| 3-5 Years                         | 0           | 0.00          | 0          | 0.00          | 0                 | 0.00          | 0           | 0.00          | 0            | 0.00          | 0          | 0.00          | 0                 | 0.00          | 0           | 0.00          |
| 6-17 Years                        | 5           | 0.78          | 1          | 0.37          | 2                 | 10.53         | 8           | 0.86          | 1            | 0.26          | 0          | 0.00          | 0                 | 0.00          | 1           | 0.14          |
| 18-29 Years                       | 317         | 49.15         | 64         | 23.79         | 1                 | 5.26          | 382         | 40.94         | 130          | 33.33         | 62         | 20.39         | 0                 | 0.00          | 192         | 27.16         |
| 30-39 Years                       | 135         | 20.93         | 51         | 18.96         | 0                 | 0.00          | 186         | 19.94         | 59           | 15.13         | 38         | 12.50         | 1                 | 7.69          | 98          | 13.86         |
| 40-49 Years                       | 62          | 9.61          | 51         | 18.96         | 0                 | 0.00          | 113         | 12.11         | 57           | 14.62         | 54         | 17.76         | 0                 | 0.00          | 111         | 15.70         |
| 50-59 Years                       | 41          | 6.36          | 37         | 13.75         | 1                 | 5.26          | 79          | 8.47          | 52           | 13.33         | 52         | 17.11         | 0                 | 0.00          | 104         | 14.71         |

|                                     |             |               |            |               |           |               |             |               |             |               |            |               |           |               |             |               |
|-------------------------------------|-------------|---------------|------------|---------------|-----------|---------------|-------------|---------------|-------------|---------------|------------|---------------|-----------|---------------|-------------|---------------|
| 60-64 Years                         | 15          | 2.33          | 24         | 8.92          | 0         | 0.00          | 39          | 4.18          | 24          | 6.15          | 31         | 10.20         | 1         | 7.69          | 56          | 7.92          |
| 65-79 Years                         | 29          | 4.50          | 35         | 13.01         | 0         | 0.00          | 64          | 6.86          | 54          | 13.85         | 53         | 17.43         | 2         | 15.38         | 109         | 15.42         |
| 80+ Years                           | 5           | 0.78          | 4          | 1.49          | 0         | 0.00          | 9           | 0.96          | 6           | 1.54          | 11         | 3.62          | 0         | 0.00          | 17          | 2.40          |
| Not Specified                       | 36          | 5.58          | 2          | 0.74          | 15        | 78.95         | 53          | 5.68          | 7           | 1.79          | 3          | 0.99          | 9         | 69.23         | 19          | 2.69          |
| <b>Total</b>                        | <b>645</b>  | <b>100.00</b> | <b>269</b> | <b>100.00</b> | <b>19</b> | <b>100.00</b> | <b>933</b>  | <b>100.00</b> | <b>390</b>  | <b>100.00</b> | <b>304</b> | <b>100.00</b> | <b>13</b> | <b>100.00</b> | <b>707</b>  | <b>100.00</b> |
| <b>Overall (both mRNA vaccines)</b> |             |               |            |               |           |               |             |               |             |               |            |               |           |               |             |               |
| <6 months                           | 0           | 0.00          | 0          | 0.00          | 0         | 0.00          | 0           | 0.00          | 0           | 0.00          | 1          | 0.14          | 0         | 0.00          | 1           | 0.05          |
| 3-5 Years                           | 2           | 0.10          | 0          | 0.00          | 0         | 0.00          | 2           | 0.07          | 1           | 0.09          | 0          | 0.00          | 0         | 0.00          | 1           | 0.05          |
| 6-17 Years                          | 530         | 26.53         | 68         | 9.67          | 4         | 7.14          | 602         | 21.84         | 146         | 13.15         | 23         | 3.13          | 1         | 4.35          | 170         | 9.10          |
| 18-29 Years                         | 721         | 36.09         | 166        | 23.61         | 2         | 3.57          | 889         | 32.25         | 347         | 31.26         | 113        | 15.35         | 0         | 0.00          | 460         | 24.61         |
| 30-39 Years                         | 292         | 14.61         | 120        | 17.07         | 2         | 3.57          | 414         | 15.02         | 175         | 15.77         | 116        | 15.76         | 1         | 4.35          | 292         | 15.62         |
| 40-49 Years                         | 130         | 6.51          | 110        | 15.65         | 0         | 0.00          | 240         | 8.71          | 113         | 10.18         | 137        | 18.61         | 0         | 0.00          | 250         | 13.38         |
| 50-59 Years                         | 82          | 4.10          | 93         | 13.23         | 1         | 1.79          | 176         | 6.38          | 116         | 10.45         | 125        | 16.98         | 0         | 0.00          | 241         | 12.89         |
| 60-64 Years                         | 28          | 1.40          | 45         | 6.40          | 2         | 3.57          | 75          | 2.72          | 44          | 3.96          | 74         | 10.05         | 1         | 4.35          | 119         | 6.37          |
| 65-79 Years                         | 81          | 4.05          | 66         | 9.39          | 2         | 3.57          | 149         | 5.40          | 121         | 10.90         | 103        | 13.99         | 4         | 17.39         | 228         | 12.20         |
| 80+ Years                           | 10          | 0.50          | 8          | 1.14          | 0         | 0.00          | 18          | 0.65          | 18          | 1.62          | 20         | 2.72          | 0         | 0.00          | 38          | 2.03          |
| Not Specified                       | 122         | 6.11          | 27         | 3.84          | 43        | 76.79         | 192         | 6.96          | 29          | 2.61          | 24         | 3.26          | 16        | 69.57         | 69          | 3.69          |
| <b>Total</b>                        | <b>1998</b> | <b>100.00</b> | <b>703</b> | <b>100.00</b> | <b>56</b> | <b>100.00</b> | <b>2757</b> | <b>100.00</b> | <b>1110</b> | <b>100.00</b> | <b>736</b> | <b>100.00</b> | <b>23</b> | <b>100.00</b> | <b>1869</b> | <b>100.00</b> |
| <b>Grand Total</b>                  | <b>1998</b> | <b>72.47</b>  | <b>703</b> | <b>25.50</b>  | <b>56</b> | <b>2.03</b>   | <b>2757</b> | <b>100.00</b> | <b>1110</b> | <b>59.39</b>  | <b>736</b> | <b>39.38</b>  | <b>23</b> | <b>1.23</b>   | <b>1869</b> | <b>100.00</b> |

Table 3a: Myocarditis and pericarditis events reported to VAERS following Pfizer/BioNTech COVID-19 vaccine (Comirnaty), by dose. Datalock point 14 March 2022. Percentages per age group are presented.

| Age Group     | Myocarditis |               |            |               |                   |               |            |               | Pericarditis |               |            |               |                   |               |            |               |
|---------------|-------------|---------------|------------|---------------|-------------------|---------------|------------|---------------|--------------|---------------|------------|---------------|-------------------|---------------|------------|---------------|
|               | Male        |               | Female     |               | Sex Not Specified |               | Total      |               | Male         |               | Female     |               | Sex Not Specified |               | Total      |               |
|               | n           | %             | n          | %             | n                 | %             | N          | %             | n            | %             | n          | %             | n                 | %             | N          | %             |
| <b>Dose 1</b> |             |               |            |               |                   |               |            |               |              |               |            |               |                   |               |            |               |
| <6 months     | 0           | 0.00          | 0          | 0.00          | 0                 | 0.00          | 0          | 0.00          | 0            | 0.00          | 0          | 0.00          | 0                 | 0.00          | 0          | 0.00          |
| 3-5 Years     | 0           | 0.00          | 0          | 0.00          | 0                 | 0.00          | 0          | 0.00          | 1            | 0.53          | 0          | 0.00          | 0                 | 0.00          | 1          | 0.30          |
| 6-17 Years    | 95          | 37.55         | 13         | 10.24         | 0                 | 0.00          | 108        | 28.20         | 28           | 14.81         | 10         | 7.09          | 0                 | 0.00          | 38         | 11.48         |
| 18-29 Years   | 69          | 27.27         | 23         | 18.11         | 0                 | 0.00          | 92         | 24.02         | 56           | 29.63         | 21         | 14.89         | 0                 | 0.00          | 77         | 23.26         |
| 30-39 years   | 37          | 14.62         | 28         | 22.05         | 1                 | 33.33         | 66         | 17.23         | 38           | 20.11         | 26         | 18.44         | 0                 | 0.00          | 64         | 19.34         |
| 40-49 years   | 15          | 5.93          | 18         | 14.17         | 0                 | 0.00          | 33         | 8.62          | 12           | 6.35          | 23         | 16.31         | 0                 | 0.00          | 35         | 10.57         |
| 50-59 years   | 8           | 3.16          | 19         | 14.96         | 0                 | 0.00          | 27         | 7.05          | 21           | 11.11         | 27         | 19.15         | 0                 | 0.00          | 48         | 14.50         |
| 60-64 years   | 3           | 1.19          | 8          | 6.30          | 0                 | 0.00          | 11         | 2.87          | 6            | 3.17          | 15         | 10.64         | 0                 | 0.00          | 21         | 6.34          |
| 65-79 Years   | 14          | 5.53          | 10         | 7.87          | 0                 | 0.00          | 24         | 6.27          | 22           | 11.64         | 13         | 9.22          | 0                 | 0.00          | 35         | 10.57         |
| 80+ Years     | 0           | 0.00          | 3          | 2.36          | 0                 | 0.00          | 3          | 0.78          | 3            | 1.59          | 2          | 1.42          | 0                 | 0.00          | 5          | 1.51          |
| Not Specified | 12          | 4.74          | 5          | 3.94          | 2                 | 66.67         | 19         | 4.96          | 2            | 1.06          | 4          | 2.84          | 1                 | 100.00        | 7          | 2.11          |
| <b>Total</b>  | <b>253</b>  | <b>100.00</b> | <b>127</b> | <b>100.00</b> | <b>3</b>          | <b>100.00</b> | <b>383</b> | <b>100.00</b> | <b>189</b>   | <b>100.00</b> | <b>141</b> | <b>100.00</b> | <b>1</b>          | <b>100.00</b> | <b>331</b> | <b>100.00</b> |
| <b>Dose 2</b> |             |               |            |               |                   |               |            |               |              |               |            |               |                   |               |            |               |
| <6 months     | 0           | 0.00          | 0          | 0.00          | 0                 | 0.00          | 0          | 0.00          | 0            | 0.00          | 1          | 0.59          | 0                 | 0.00          | 1          | 0.19          |
| 3-5 Years     | 2           | 0.27          | 0          | 0.00          | 0                 | 0.00          | 2          | 0.21          | 0            | 0.00          | 0          | 0.00          | 0                 | 0.00          | 0          | 0.00          |
| 6-17 Years    | 305         | 40.99         | 37         | 18.05         | 1                 | 14.29         | 343        | 35.88         | 83           | 23.12         | 11         | 6.51          | 0                 | 0.00          | 94         | 17.67         |
| 18-29 Years   | 210         | 28.23         | 47         | 22.93         | 1                 | 14.29         | 258        | 26.99         | 105          | 29.25         | 15         | 8.88          | 0                 | 0.00          | 120        | 22.56         |
| 30-39 years   | 84          | 11.29         | 34         | 16.59         | 0                 | 0.00          | 118        | 12.34         | 62           | 17.27         | 32         | 18.93         | 0                 | 0.00          | 94         | 17.67         |
| 40-49 years   | 41          | 5.51          | 29         | 14.15         | 0                 | 0.00          | 70         | 7.32          | 27           | 7.52          | 30         | 17.75         | 0                 | 0.00          | 57         | 10.71         |
| 50-59 years   | 17          | 2.28          | 26         | 12.68         | 0                 | 0.00          | 43         | 4.50          | 32           | 8.91          | 31         | 18.34         | 0                 | 0.00          | 63         | 11.84         |
| 60-64 years   | 6           | 0.81          | 6          | 2.93          | 0                 | 0.00          | 12         | 1.26          | 7            | 1.95          | 17         | 10.06         | 0                 | 0.00          | 24         | 4.51          |

|                     |            |               |            |               |          |               |            |               |            |               |            |               |          |               |            |               |
|---------------------|------------|---------------|------------|---------------|----------|---------------|------------|---------------|------------|---------------|------------|---------------|----------|---------------|------------|---------------|
| 65-79 Years         | 21         | 2.82          | 14         | 6.83          | 0        | 0.00          | 35         | 3.66          | 28         | 7.80          | 19         | 11.24         | 1        | 25.00         | 48         | 9.02          |
| 80+ Years           | 3          | 0.40          | 0          | 0.00          | 0        | 0.00          | 3          | 0.31          | 6          | 1.67          | 3          | 1.78          | 0        | 0.00          | 9          | 1.69          |
| Not Specified       | 55         | 7.39          | 12         | 5.85          | 5        | 71.43         | 72         | 7.53          | 9          | 2.51          | 10         | 5.92          | 3        | 75.00         | 22         | 4.14          |
| <b>Total</b>        | <b>744</b> | <b>100.00</b> | <b>205</b> | <b>100.00</b> | <b>7</b> | <b>100.00</b> | <b>956</b> | <b>100.00</b> | <b>359</b> | <b>100.00</b> | <b>169</b> | <b>100.00</b> | <b>4</b> | <b>100.00</b> | <b>532</b> | <b>100.00</b> |
| <b>Dose 3</b>       |            |               |            |               |          |               |            |               |            |               |            |               |          |               |            |               |
| <6 months           | 0          | 0.00          | 0          | 0.00          | 0        | 0.00          | 0          | 0.00          | 0          | 0.00          | 0          | 0.00          | 0        | 0.00          | 0          | 0.00          |
| 3-5 Years           | 0          | 0.00          | 0          | 0.00          | 0        | 0.00          | 0          | 0.00          | 0          | 0.00          | 0          | 0.00          | 0        | 0.00          | 0          | 0.00          |
| 6-17 Years          | 34         | 32.08         | 4          | 12.12         | 0        | 0.00          | 38         | 26.57         | 10         | 18.87         | 0          | 0.00          | 0        | 0.00          | 10         | 9.01          |
| 18-29 Years         | 29         | 27.36         | 9          | 27.27         | 0        | 0.00          | 38         | 26.57         | 10         | 18.87         | 5          | 8.93          | 0        | 0.00          | 15         | 13.51         |
| 30-39 years         | 13         | 12.26         | 4          | 12.12         | 0        | 0.00          | 17         | 11.89         | 5          | 9.43          | 13         | 23.21         | 0        | 0.00          | 18         | 16.22         |
| 40-49 years         | 2          | 1.89          | 5          | 15.15         | 0        | 0.00          | 7          | 4.90          | 7          | 13.21         | 17         | 30.36         | 0        | 0.00          | 24         | 21.62         |
| 50-59 years         | 7          | 6.60          | 4          | 12.12         | 0        | 0.00          | 11         | 7.69          | 4          | 7.55          | 7          | 12.50         | 0        | 0.00          | 11         | 9.91          |
| 60-64 years         | 2          | 1.89          | 3          | 9.09          | 0        | 0.00          | 5          | 3.50          | 1          | 1.89          | 6          | 10.71         | 0        | 0.00          | 7          | 6.31          |
| 65-79 Years         | 12         | 11.32         | 3          | 9.09          | 2        | 50.00         | 17         | 11.89         | 11         | 20.75         | 5          | 8.93          | 1        | 50.00         | 17         | 15.32         |
| 80+ Years           | 2          | 1.89          | 0          | 0.00          | 0        | 0.00          | 2          | 1.40          | 3          | 5.66          | 1          | 1.79          | 0        | 0.00          | 4          | 3.60          |
| Not Specified       | 5          | 4.72          | 1          | 3.03          | 2        | 50.00         | 8          | 5.59          | 2          | 3.77          | 2          | 3.57          | 1        | 50.00         | 5          | 4.50          |
| <b>Total</b>        | <b>106</b> | <b>100.00</b> | <b>33</b>  | <b>100.00</b> | <b>4</b> | <b>100.00</b> | <b>143</b> | <b>100.00</b> | <b>53</b>  | <b>100.00</b> | <b>56</b>  | <b>100.00</b> | <b>2</b> | <b>100.00</b> | <b>111</b> | <b>100.00</b> |
| <b>Dose 4+</b>      |            |               |            |               |          |               |            |               |            |               |            |               |          |               |            |               |
| 60-64 Years         | 0          | 0.00          | 0          | 0.00          | 0        | 0.00          | 0          | 0.00          | 0          | 0.00          | 2          | 100.00        | 0        | 0.00          | 2          | 100.00        |
| <b>Total</b>        | <b>0</b>   | <b>0.00</b>   | <b>0</b>   | <b>0.00</b>   | <b>0</b> | <b>0.00</b>   | <b>0</b>   | <b>0.00</b>   | <b>0</b>   | <b>0.00</b>   | <b>2</b>   | <b>100.00</b> | <b>0</b> | <b>0.00</b>   | <b>2</b>   | <b>100.00</b> |
| <b>Unknown dose</b> |            |               |            |               |          |               |            |               |            |               |            |               |          |               |            |               |
| <6 months           | 0          | 0.00          | 0          | 0.00          | 0        | 0.00          | 0          | 0.00          | 0          | 0.00          | 0          | 0.00          | 0        | 0.00          | 0          | 0.00          |
| 3-5 Years           | 0          | 0.00          | 0          | 0.00          | 0        | 0.00          | 0          | 0.00          | 0          | 0.00          | 0          | 0.00          | 0        | 0.00          | 0          | 0.00          |
| 6-17 Years          | 91         | 36.40         | 13         | 18.84         | 1        | 4.35          | 105        | 30.70         | 24         | 20.17         | 2          | 3.13          | 1        | 25.00         | 27         | 14.44         |
| 18-29 Years         | 96         | 38.40         | 23         | 33.33         | 0        | 0.00          | 119        | 34.80         | 46         | 38.66         | 10         | 15.63         | 0        | 0.00          | 56         | 29.95         |
| 30-39 years         | 23         | 9.20          | 3          | 4.35          | 1        | 4.35          | 27         | 7.89          | 11         | 9.24          | 7          | 10.94         | 0        | 0.00          | 18         | 9.63          |

|               |      |        |     |        |    |        |             |        |     |        |     |        |    |        |             |        |
|---------------|------|--------|-----|--------|----|--------|-------------|--------|-----|--------|-----|--------|----|--------|-------------|--------|
| 40-49 years   | 10   | 4.00   | 7   | 10.14  | 0  | 0.00   | 17          | 4.97   | 10  | 8.40   | 13  | 20.31  | 0  | 0.00   | 23          | 12.30  |
| 50-59 years   | 9    | 3.60   | 7   | 10.14  | 0  | 0.00   | 16          | 4.68   | 7   | 5.88   | 8   | 12.50  | 0  | 0.00   | 15          | 8.02   |
| 60-64 years   | 2    | 0.80   | 4   | 5.80   | 2  | 8.70   | 8           | 2.34   | 6   | 5.04   | 3   | 4.69   | 0  | 0.00   | 9           | 4.81   |
| 65-79 Years   | 5    | 2.00   | 4   | 5.80   | 0  | 0.00   | 9           | 2.63   | 6   | 5.04   | 13  | 20.31  | 1  | 25.00  | 20          | 10.70  |
| 80+ Years     | 0    | 0.00   | 1   | 1.45   | 0  | 0.00   | 1           | 0.29   | 0   | 0.00   | 3   | 4.69   | 0  | 0.00   | 3           | 1.60   |
| Not Specified | 14   | 5.60   | 7   | 10.14  | 19 | 82.61  | 40          | 11.70  | 9   | 7.56   | 5   | 7.81   | 2  | 50.00  | 16          | 8.56   |
| Total         | 250  | 100.00 | 69  | 100.00 | 23 | 100.00 | 342         | 100.00 | 119 | 100.00 | 64  | 100.00 | 4  | 100.00 | 187         | 100.00 |
| Grand Total   | 1353 |        | 434 |        | 37 |        | <b>1824</b> |        | 720 |        | 432 |        | 11 |        | <b>1162</b> |        |

Table 3b: Myocarditis and pericarditis events reported to VAERS following Moderna COVID-19 vaccine (Spikevax), by dose. Datalock point 14 March 2022. Percentages per age group are presented.

| Age Group     | Myocarditis |        |        |        |                   |        |       |        | Pericarditis |        |        |        |                   |        |       |        |
|---------------|-------------|--------|--------|--------|-------------------|--------|-------|--------|--------------|--------|--------|--------|-------------------|--------|-------|--------|
|               | Male        |        | Female |        | Sex Not Specified |        | Total |        | Male         |        | Female |        | Sex Not Specified |        | Total |        |
|               | n           | %      | n      | %      | n                 | %      | N     | %      | n            | %      | n      | %      | n                 | %      | N     | %      |
| <b>Dose 1</b> |             |        |        |        |                   |        |       |        |              |        |        |        |                   |        |       |        |
| <6 months     | 0           | 0.00   | 0      | 0.00   | 0                 | 0.00   | 0     | 0.00   | 0            | 0.00   | 0      | 0.00   | 0                 | 0.00   | 0     | 0.00   |
| 3-5 Years     | 0           | 0.00   | 0      | 0.00   | 0                 | 0.00   | 0     | 0.00   | 0            | 0.00   | 0      | 0.00   | 0                 | 0.00   | 0     | 0.00   |
| 6-17 Years    | 1           | 0.56   | 0      | 0.00   | 0                 | 0.00   | 1     | 0.35   | 0            | 0.00   | 0      | 0.00   | 0                 | 0.00   | 0     | 0.00   |
| 18-29 Years   | 74          | 41.11  | 18     | 18.00  | 0                 | 0.00   | 92    | 32.17  | 33           | 32.35  | 23     | 20.00  | 0                 | 0.00   | 56    | 25.23  |
| 30-39 years   | 42          | 23.33  | 18     | 18.00  | 0                 | 0.00   | 60    | 20.98  | 15           | 14.71  | 17     | 14.78  | 0                 | 0.00   | 32    | 14.41  |
| 40-49 years   | 16          | 8.89   | 21     | 21.00  | 0                 | 0.00   | 37    | 12.94  | 21           | 20.59  | 20     | 17.39  | 0                 | 0.00   | 41    | 18.47  |
| 50-59 years   | 15          | 8.33   | 16     | 16.00  | 1                 | 16.67  | 32    | 11.19  | 12           | 11.76  | 19     | 16.52  | 0                 | 0.00   | 31    | 13.96  |
| 60-64 years   | 3           | 1.67   | 15     | 15.00  | 0                 | 0.00   | 18    | 6.29   | 7            | 6.86   | 12     | 10.43  | 0                 | 0.00   | 19    | 8.56   |
| 65-79 Years   | 10          | 5.56   | 11     | 11.00  | 0                 | 0.00   | 21    | 7.34   | 11           | 10.78  | 16     | 13.91  | 2                 | 40.00  | 29    | 13.06  |
| 80+ Years     | 2           | 1.11   | 1      | 1.00   | 0                 | 0.00   | 3     | 1.05   | 0            | 0.00   | 5      | 4.35   | 0                 | 0.00   | 5     | 2.25   |
| Not Specified | 17          | 9.44   | 0      | 0.00   | 5                 | 83.33  | 22    | 7.69   | 3            | 2.94   | 3      | 2.61   | 3                 | 60.00  | 9     | 4.05   |
| Total         | 180         | 100.00 | 100    | 100.00 | 6                 | 100.00 | 286   | 100.00 | 102          | 100.00 | 115    | 100.00 | 5                 | 100.00 | 222   | 100.00 |
| <b>Dose 2</b> |             |        |        |        |                   |        |       |        |              |        |        |        |                   |        |       |        |
| <6 months     | 0           | 0.00   | 0      | 0.00   | 0                 | 0.00   | 0     | 0.00   | 0            | 0.00   | 0      | 0.00   | 0                 | 0.00   | 0     | 0.00   |
| 3-5 Years     | 0           | 0.00   | 0      | 0.00   | 0                 | 0.00   | 0     | 0.00   | 0            | 0.00   | 0      | 0.00   | 0                 | 0.00   | 0     | 0.00   |
| 6-17 Years    | 2           | 0.72   | 0      | 0.00   | 0                 | 0.00   | 2     | 0.52   | 1            | 0.55   | 0      | 0.00   | 0                 | 0.00   | 1     | 0.33   |
| 18-29 Years   | 152         | 54.48  | 29     | 29.00  | 1                 | 20.00  | 182   | 47.40  | 63           | 34.81  | 24     | 19.67  | 0                 | 0.00   | 87    | 28.52  |
| 30-39 years   | 57          | 20.43  | 15     | 15.00  | 0                 | 0.00   | 72    | 18.75  | 30           | 16.57  | 11     | 9.02   | 0                 | 0.00   | 41    | 13.44  |
| 40-49 years   | 24          | 8.60   | 24     | 24.00  | 0                 | 0.00   | 48    | 12.50  | 20           | 11.05  | 21     | 17.21  | 0                 | 0.00   | 41    | 13.44  |
| 50-59 years   | 20          | 7.17   | 13     | 13.00  | 0                 | 0.00   | 33    | 8.59   | 25           | 13.81  | 24     | 19.67  | 0                 | 0.00   | 49    | 16.07  |
| 60-64 years   | 6           | 2.15   | 5      | 5.00   | 0                 | 0.00   | 11    | 2.86   | 10           | 5.52   | 12     | 9.84   | 0                 | 0.00   | 22    | 7.21   |



|                     |            |               |            |               |          |               |            |               |            |               |            |               |          |               |            |               |
|---------------------|------------|---------------|------------|---------------|----------|---------------|------------|---------------|------------|---------------|------------|---------------|----------|---------------|------------|---------------|
| 65-79 Years         | 13         | 4.66          | 12         | 12.00         | 0        | 0.00          | 25         | 6.51          | 26         | 14.36         | 26         | 21.31         | 0        | 0.00          | 52         | 17.05         |
| 80+ Years           | 1          | 0.36          | 1          | 1.00          | 0        | 0.00          | 2          | 0.52          | 4          | 2.21          | 4          | 3.28          | 0        | 0.00          | 8          | 2.62          |
| Not Specified       | 4          | 1.43          | 1          | 1.00          | 4        | 80.00         | 9          | 2.34          | 2          | 1.10          | 0          | 0.00          | 2        | 100.00        | 4          | 1.31          |
| <b>Total</b>        | <b>279</b> | <b>100.00</b> | <b>100</b> | <b>100.00</b> | <b>5</b> | <b>100.00</b> | <b>384</b> | <b>100.00</b> | <b>181</b> | <b>100.00</b> | <b>122</b> | <b>100.00</b> | <b>2</b> | <b>100.00</b> | <b>305</b> | <b>100.00</b> |
| <b>Dose 3</b>       |            |               |            |               |          |               |            |               |            |               |            |               |          |               |            |               |
| <6 months           | 0          | 0.00          | 0          | 0.00          | 0        | 0.00          | 0          | 0.00          | 0          | 0.00          | 0          | 0.00          | 0        | 0.00          | 0          | 0.00          |
| 3-5 Years           | 0          | 0.00          | 0          | 0.00          | 0        | 0.00          | 0          | 0.00          | 0          | 0.00          | 0          | 0.00          | 0        | 0.00          | 0          | 0.00          |
| 6-17 Years          | 1          | 1.96          | 0          | 0.00          | 0        | 0.00          | 1          | 1.16          | 0          | 0.00          | 0          | 0.00          | 0        | 0.00          | 0          | 0.00          |
| 18-29 Years         | 29         | 56.86         | 8          | 22.86         | 0        | 0.00          | 37         | 43.02         | 10         | 29.41         | 6          | 16.22         | 0        | 0.00          | 16         | 22.54         |
| 30-39 years         | 9          | 17.65         | 10         | 28.57         | 0        | 0.00          | 19         | 22.09         | 4          | 11.76         | 7          | 18.92         | 0        | 0.00          | 11         | 15.49         |
| 40-49 years         | 6          | 11.76         | 4          | 11.43         | 0        | 0.00          | 10         | 11.63         | 5          | 14.71         | 8          | 21.62         | 0        | 0.00          | 13         | 18.31         |
| 50-59 years         | 2          | 3.92          | 4          | 11.43         | 0        | 0.00          | 6          | 6.98          | 7          | 20.59         | 5          | 13.51         | 0        | 0.00          | 12         | 16.90         |
| 60-64 years         | 1          | 1.96          | 2          | 5.71          | 0        | 0.00          | 3          | 3.49          | 1          | 2.94          | 3          | 8.11          | 0        | 0.00          | 4          | 5.63          |
| 65-79 Years         | 3          | 5.88          | 6          | 17.14         | 0        | 0.00          | 9          | 10.47         | 6          | 17.65         | 6          | 16.22         | 0        | 0.00          | 12         | 16.90         |
| 80+ Years           | 0          | 0.00          | 1          | 2.86          | 0        | 0.00          | 1          | 1.16          | 1          | 2.94          | 2          | 5.41          | 0        | 0.00          | 3          | 4.23          |
| Not Specified       | 0          | 0.00          | 0          | 0.00          | 0        | 0.00          | 0          | 0.00          | 0          | 0.00          | 0          | 0.00          | 0        | 0.00          | 0          | 0.00          |
| <b>Total</b>        | <b>51</b>  | <b>100.00</b> | <b>35</b>  | <b>100.00</b> | <b>0</b> | <b>0.00</b>   | <b>86</b>  | <b>100.00</b> | <b>34</b>  | <b>100.00</b> | <b>37</b>  | <b>100.00</b> | <b>0</b> | <b>0.00</b>   | <b>71</b>  | <b>100.00</b> |
| <b>Dose 4+</b>      |            |               |            |               |          |               |            |               |            |               |            |               |          |               |            |               |
| 40-49 Years         | 0          | 0.00          | 1          | 100.00        | 0        | 0.00          | 1          | 100.00        | 0          | 0.00          | 0          | 0.00          | 0        | 0.00          | 0          | 0.00          |
| <b>Total</b>        | <b>0</b>   | <b>0.00</b>   | <b>1</b>   | <b>100.00</b> | <b>0</b> | <b>0.00</b>   | <b>1</b>   | <b>100.00</b> | <b>0</b>   | <b>0.00</b>   | <b>0</b>   | <b>0.00</b>   | <b>0</b> | <b>0.00</b>   | <b>0</b>   | <b>0.00</b>   |
|                     |            |               |            |               |          |               |            |               |            |               |            |               |          |               |            |               |
| <b>Unknown dose</b> |            |               |            |               |          |               |            |               |            |               |            |               |          |               |            |               |
| <6 months           | 0          | 0.00          | 0          | 0.00          | 0        | 0.00          | 0          | 0.00          | 0          | 0.00          | 0          | 0.00          | 0        | 0.00          | 0          | 0.00          |
| 3-5 Years           | 0          | 0.00          | 0          | 0.00          | 0        | 0.00          | 0          | 0.00          | 0          | 0.00          | 0          | 0.00          | 0        | 0.00          | 0          | 0.00          |
| 6-17 Years          | 1          | 0.74          | 1          | 3.03          | 2        | 25.00         | 4          | 2.27          | 0          | 0.00          | 0          | 0.00          | 0        | 0.00          | 0          | 0.00          |
| 18-29 Years         | 62         | 45.93         | 9          | 27.27         | 0        | 0.00          | 71         | 40.34         | 24         | 32.88         | 9          | 30.00         | 0        | 0.00          | 33         | 30.28         |
| 30-39 years         | 27         | 20.00         | 8          | 24.24         | 0        | 0.00          | 35         | 19.89         | 10         | 13.70         | 3          | 10.00         | 1        | 16.67         | 14         | 12.84         |
| 40-49 years         | 16         | 11.85         | 1          | 3.03          | 0        | 0.00          | 17         | 9.66          | 11         | 15.07         | 5          | 16.67         | 0        | 0.00          | 16         | 14.68         |

|               |     |        |     |        |    |        |            |        |     |        |     |        |    |        |            |        |
|---------------|-----|--------|-----|--------|----|--------|------------|--------|-----|--------|-----|--------|----|--------|------------|--------|
| 50-59 years   | 4   | 2.96   | 4   | 12.12  | 0  | 0.00   | 8          | 4.55   | 8   | 10.96  | 4   | 13.33  | 0  | 0.00   | 12         | 11.01  |
| 60-64 years   | 5   | 3.70   | 2   | 6.06   | 0  | 0.00   | 7          | 3.98   | 6   | 8.22   | 4   | 13.33  | 1  | 16.67  | 11         | 10.09  |
| 65-79 Years   | 3   | 2.22   | 6   | 18.18  | 0  | 0.00   | 9          | 5.11   | 11  | 15.07  | 5   | 16.67  | 0  | 0.00   | 16         | 14.68  |
| 80+ Years     | 2   | 1.48   | 1   | 3.03   | 0  | 0.00   | 3          | 1.70   | 1   | 1.37   | 0   | 0.00   | 0  | 0.00   | 1          | 0.92   |
| Not Specified | 15  | 11.11  | 1   | 3.03   | 6  | 75.00  | 22         | 12.50  | 2   | 2.74   | 0   | 0.00   | 4  | 66.67  | 6          | 5.50   |
| Total         | 135 | 100.00 | 33  | 100.00 | 8  | 100.00 | 176        | 100.00 | 73  | 100.00 | 30  | 100.00 | 6  | 100.00 | 109        | 100.00 |
| Grand Total   | 645 |        | 269 |        | 19 |        | <b>933</b> |        | 390 |        | 304 |        | 13 |        | <b>707</b> |        |

Table 4: Myocarditis and pericarditis events reported to EudraVigilance for the European Economic Area. Datalock point 14 March 2022. Percentages per age group are presented.

| Age Group                          | Myocarditis |       |        |       |                   |       |             |               | Pericarditis |       |        |        |                   |      |             |               |
|------------------------------------|-------------|-------|--------|-------|-------------------|-------|-------------|---------------|--------------|-------|--------|--------|-------------------|------|-------------|---------------|
|                                    | Male        |       | Female |       | Sex Not Specified |       | Total       |               | Male         |       | Female |        | Sex Not Specified |      | Total       |               |
|                                    | n           | %     | n      | %     | n                 | %     | N           | %             | n            | %     | n      | %      | n                 | %    | N           | %             |
| <b>Comirnaty (Pfizer/BioNTech)</b> |             |       |        |       |                   |       |             |               |              |       |        |        |                   |      |             |               |
| 2 Months-2 Years                   | 0           | 0.00  | 0      | 0.00  | 0                 | 0.00  | 0           | 0.00          | 67           | 63.81 | 38     | 36.19  | 0                 | 0.00 | 105         | 100.00        |
| 3-11 Years                         | 4           | 66.67 | 2      | 33.33 | 0                 | 0.00  | 6           | 100.00        | 798          | 48.33 | 848    | 51.36  | 5                 | 0.30 | 1651        | 100.00        |
| 12-17 Years                        | 507         | 86.82 | 72     | 12.33 | 5                 | 0.86  | 584         | 100.00        | 164          | 56.75 | 125    | 43.25  | 0                 | 0.00 | 289         | 100.00        |
| 18-64 Years                        | 2302        | 70.16 | 956    | 29.14 | 23                | 0.70  | 3281        | 100.00        | 307          | 46.30 | 351    | 52.94  | 5                 | 0.75 | 663         | 100.00        |
| 65-85 Years                        | 130         | 50.58 | 125    | 48.64 | 2                 | 0.78  | 257         | 100.00        | 54           | 46.55 | 62     | 53.45  | 0                 | 0.00 | 116         | 100.00        |
| 85+ Years                          | 12          | 52.17 | 11     | 47.83 | 0                 | 0.00  | 23          | 100.00        | 1042         | 50.27 | 1026   | 49.49  | 5                 | 0.24 | 2073        | 100.00        |
| Not Specified                      | 86          | 60.56 | 39     | 27.46 | 17                | 11.97 | 142         | 100.00        | 8            | 38.10 | 11     | 52.38  | 2                 | 9.52 | 21          | 100.00        |
| Total                              | 3041        | 70.84 | 1205   | 28.07 | 47                | 1.09  | <b>4293</b> | <b>100.00</b> | 2440         | 49.61 | 2461   | 50.04  | 17                | 0.35 | <b>4918</b> | <b>100.00</b> |
| <b>Spikevax (Moderna)</b>          |             |       |        |       |                   |       |             |               |              |       |        |        |                   |      |             |               |
| 2 Months-2 Years                   | 0           | 0.00  | 0      | 0.00  | 0                 | 0.00  | 0           | 0.00          | 8            | 0.00  | 4      | 0.00   | 0                 | 0.00 | 12          | 100.00        |
| 3-11 Years                         | 0           | 0.00  | 0      | 0.00  | 0                 | 0.00  | 0           | 0.00          | 343          | 0.00  | 287    | 0.00   | 5                 | 0.79 | 635         | 100.00        |
| 12-17 Years                        | 69          | 92.00 | 6      | 8.00  | 0                 | 0.00  | 75          | 100.00        | 39           | 0.00  | 45     | 0.00   | 0                 | 0.00 | 84          | 100.00        |
| 18-64 Years                        | 913         | 79.39 | 231    | 20.09 | 6                 | 0.52  | 1150        | 100.00        | 0            | 0.00  | 2      | 100.00 | 0                 | 0.00 | 2           | 100.00        |
| 65-85 Years                        | 27          | 48.21 | 29     | 51.79 | 0                 | 0.00  | 56          | 100.00        | 4            | 50.00 | 4      | 50.00  | 0                 | 0.00 | 8           | 100.00        |
| 85+ Years                          | 1           | 33.33 | 2      | 66.67 | 0                 | 0.00  | 3           | 100.00        | 394          | 53.17 | 342    | 46.15  | 5                 | 0.67 | 741         | 100.00        |

|                                     |             |              |             |              |           |             |             |               |             |              |             |              |           |             |             |               |
|-------------------------------------|-------------|--------------|-------------|--------------|-----------|-------------|-------------|---------------|-------------|--------------|-------------|--------------|-----------|-------------|-------------|---------------|
| Not Specified                       | 11          | 55.00        | 7           | 35.00        | 2         | 10.00       | 20          | 100.00        | 0           | 0.00         | 0           | 0.00         | 0         | 0.00        | 0           | -             |
| <b>Total</b>                        | <b>1021</b> | <b>78.30</b> | <b>275</b>  | <b>21.09</b> | <b>8</b>  | <b>0.61</b> | <b>1304</b> | <b>100.00</b> | <b>788</b>  | <b>53.17</b> | <b>684</b>  | <b>46.15</b> | <b>10</b> | <b>0.67</b> | <b>1482</b> | <b>100.00</b> |
| <b>Overall (both mRNA vaccines)</b> |             |              |             |              |           |             |             |               |             |              |             |              |           |             |             |               |
| 2 Months-2 Years                    | 0           | 0.00         | 0           | 0.00         | 0         | 0.00        | 0           | -             | 75          | 64.10        | 42          | 35.90        | 0         | 0.00        | 117         | 100.00        |
| 3-11 Years                          | 4           | 66.67        | 2           | 33.33        | 0         | 0.00        | 6           | 100.00        | 1141        | 49.91        | 1135        | 49.65        | 10        | 0.44        | 2286        | 100.00        |
| 12-17 Years                         | 576         | 87.41        | 78          | 11.84        | 5         | 0.76        | 659         | 100.00        | 203         | 54.42        | 170         | 45.58        | 0         | 0.00        | 373         | 100.00        |
| 18-64 Years                         | 3215        | 72.56        | 1187        | 26.79        | 29        | 0.65        | 4431        | 100.00        | 307         | 46.17        | 353         | 53.08        | 5         | 0.75        | 665         | 100.00        |
| 65-85 Years                         | 157         | 50.16        | 154         | 49.20        | 2         | 0.64        | 313         | 100.00        | 58          | 46.77        | 66          | 53.23        | 0         | 0.00        | 124         | 100.00        |
| 85+ Years                           | 13          | 50.00        | 13          | 50.00        | 0         | 0.00        | 26          | 100.00        | 1436        | 51.03        | 1368        | 48.61        | 10        | 0.36        | 2814        | 100.00        |
| Not Specified                       | 97          | 59.88        | 46          | 28.40        | 19        | 11.73       | 162         | 100.00        | 8           | 38.10        | 11          | 52.38        | 2         | 9.52        | 21          | 100.00        |
| <b>Total</b>                        | <b>4058</b> | <b>72.55</b> | <b>1480</b> | <b>26.46</b> | <b>55</b> | <b>0.98</b> | <b>5593</b> | <b>100.00</b> | <b>3228</b> | <b>50.44</b> | <b>3145</b> | <b>49.14</b> | <b>27</b> | <b>0.42</b> | <b>6400</b> | <b>100.00</b> |

Table 5: Details of each study identified by systematic review which met the inclusion criteria.

|   | First author & citation | Study design                                                                                                                      | Study period                    | Vaccine            | Population                                       | No. cases in exposed to mRNA vaccine                                                                          | Diagnostic criteria | Percentage of cases who were male | Age of cases            | Vaccine dose                         | RR (95% CI)                                                               | Incidence (95% CI)                                                                                                        |
|---|-------------------------|-----------------------------------------------------------------------------------------------------------------------------------|---------------------------------|--------------------|--------------------------------------------------|---------------------------------------------------------------------------------------------------------------|---------------------|-----------------------------------|-------------------------|--------------------------------------|---------------------------------------------------------------------------|---------------------------------------------------------------------------------------------------------------------------|
| 1 | Barda (47)              | Cohort with unvaccinated comparator                                                                                               | December 2020 - May 2021        | Comirnaty          | Israel, electronic health records                | Myocarditis n=21;<br>Pericarditis n=27                                                                        |                     | NR                                | NR                      | NR                                   | Myocarditis = 3.24 (1.55 to 12.44);<br>Pericarditis = 1.27 (0.68 to 2.31) | NC                                                                                                                        |
| 2 | Chouchana (24)          | Analysis of VigiBase spontaneous reports                                                                                          | Vaccine launch - end June 2021  | mRNA COVID vaccine | Vigibase reports                                 | Myocarditis n=1241;<br><br>Pericarditis n=851;<br><br>Myo-pericarditis n=167;<br><br>Pleuro-pericarditis n=18 |                     | 68.30%                            | Median 33 (21–54) years | NR                                   | NC                                                                        | NC                                                                                                                        |
| 3 | Chua (48)               | Population cohort study                                                                                                           | 14 June 2021 - 4 September 2021 | Comirnaty          | Hong Kong adolescents, electronic health records | n=33 cases (myocarditis/pericarditis)                                                                         |                     | 87.88%                            | Median 15.25 years      | 81.82% followed 2 <sup>nd</sup> dose | NC                                                                        | Overall = 18.52 (95% CI 11.67–29.01);<br><br>Males = 32.29 (95% CI 22.78–45.4);<br><br>Females = 4.53 (95% CI 1.76–11.11) |
| 4 | Das (49)                | Cross sectional study of 25 children aged 12-18 years diagnosed with probable myopericarditis following COVID-19 mRNA vaccination | 10 May 2021 - 20 June 2021      | Comirnaty          | Adolescents presenting at 8 US centres           | n=25 (myo-pericarditis)                                                                                       |                     | 88%                               | Range 12-17 years       | 88% followed 2 <sup>nd</sup> dose    | NC                                                                        | NC                                                                                                                        |

|    |                 |                                          |                                     |                                    |                                                                                                       |                                               |                                         |                                                                                           |                                                             |                                        |    |
|----|-----------------|------------------------------------------|-------------------------------------|------------------------------------|-------------------------------------------------------------------------------------------------------|-----------------------------------------------|-----------------------------------------|-------------------------------------------------------------------------------------------|-------------------------------------------------------------|----------------------------------------|----|
| 5  | Diaz (50)       | Retrospective cohort                     | Vaccine launch - 25 May 2021        | mrNA COVID vaccine plus AZ vaccine | 40 US hospitals, electronic health records                                                            | Myocarditis n=20; pericarditis n=35           | Myocarditis 75%; pericarditis 73%       | Myocarditis cases median 36 (26.3-48.3) years; Pericarditis cases median 59 (46-69) years | NR                                                          | NC                                     | NC |
| 6  | Eggebrecht (51) | Cohort                                   | 27 December 2020 - 3 September 2021 | All COVID vaccines                 | 113 patients at cardiology unit                                                                       | Comirnaty cases n=85; Spikevax n=13           | 56%                                     | Average age 45.9 years, 95% CI 43.2–48.7                                                  | 57% followed 2 <sup>nd</sup> dose                           | NC                                     | NC |
| 7  | Farahmand (25)  | Cohort                                   | 3 August 2020 – 21 May 2021         | All COVID vaccines                 | Patients and employees of the Beth Israel Deaconess Medical Center (BIDMC), electronic health records | n=7                                           | 50.00%                                  | Participants aged 25 years and older                                                      | NR                                                          | Age adjusted rate ratio = 9.7 (p=0.04) | NC |
| 8  | Foltran (52)    | Analysis of VigiBase spontaneous reports | 1 January - 14 September 2021       | mrNA COVID vaccines                | Vigibase reports for adolescents aged 12-17 years                                                     | n=242 cases (pericarditis and/or myocarditis) | 85%                                     | Mean 15.8 (+/- 1.4yrs)                                                                    | 1 or 2 doses                                                | NC                                     | NC |
| 9  | Fronza (53)     | Retrospective cohort                     | December 2019 – November 2021       | All COVID vaccines                 | Consecutive adults referred to a tertiary hospital network for MRI                                    | Spikevax n=12; Comirnaty n=9                  | 81%                                     | Mean (SD) 31 (14) years                                                                   | 17 followed 2 <sup>nd</sup> dose                            | NC                                     | NC |
| 10 | Gargano (54)    | Analysis of VAERS spontaneous reports    | 29 December 2020 – 11 June 2021     | mrNA COVID vaccines                | VAERS reports                                                                                         | n=1226                                        | 76.2% of 1212 cases where sex available | Median age 26 years (range 12–94 years)                                                   | 76% followed 2 <sup>nd</sup> dose (where dose was reported) | NC                                     | NC |
| 11 | Golino (55)     | Observational study                      | June - August 2021                  | mrNA COVID vaccines                | Hospital admissions, University of Insubria, Varese, Italy                                            | n=12 (myo-pericarditis)                       | 33% of cases were young males           | Males aged 29 (+/- 12) years                                                              | NR                                                          | NC                                     | NC |
| 12 | Hajjo (38)      | VAERS analysis                           | Vaccine launch – 2 September 2021   | All COVID vaccines                 | VAERS reports                                                                                         | Myocarditis = 1579; Pericarditis = 1063       | myo = 77%, peri = 65%                   | Range 6-80+ years                                                                         | 1-3 doses                                                   | NC                                     | NC |

|    |                 |                                  |                                 |                        |                                                                                                     |                                 |        |                                             |                                        |                                                                                               |                                                                                                                                                                                                                          |
|----|-----------------|----------------------------------|---------------------------------|------------------------|-----------------------------------------------------------------------------------------------------|---------------------------------|--------|---------------------------------------------|----------------------------------------|-----------------------------------------------------------------------------------------------|--------------------------------------------------------------------------------------------------------------------------------------------------------------------------------------------------------------------------|
| 13 | Hause (12)      | VAERS & V-Safe analysis          | 14 December 2020 – 16 July 2021 | Comirnaty              | VAERS and V-Safe reports for adolescents                                                            | n=379 (myocarditis)             | NR     | NR                                          | NR                                     | NC                                                                                            | NC                                                                                                                                                                                                                       |
| 14 | Husby (56)      | Population-based cohort study    | 1 October 2020 – 5 October 2021 | All COVID vaccines     | Danish health records databases (all individuals in Denmark aged 12 and over)                       | Comirnaty n=48; Spikevax n=21   | NR     | NR                                          | NR                                     | NC                                                                                            | Absolute rate within 28 days of vaccination:<br><br>Overall = 1.7 (95% CI 1.3 to 2.2) per 100,000 vaccinated individuals.<br><br>Comirnaty = 1.4 (1.0 to 1.8) per 100,000<br><br>Spikevax = 4.2 (2.6 to 6.4) per 100,000 |
| 15 | Jain (26)       | Retrospective multicentre study  | March 2021 – June 2021          | mRNA COVID vaccines    | Patients <21 years presenting to 16 US hospitals                                                    | Comirnaty n=59; Spikevax n=4    | 92%    | Mean 15.6 ± 1.8 years (range 12 – 20 years) | 62 cases followed 2 <sup>nd</sup> dose | NC                                                                                            | NC                                                                                                                                                                                                                       |
| 16 | Kerneis (57)    | Vigibase analysis                | 1967 – 7 May 2021               | All COVID vaccines     | Vigibase reports                                                                                    | Comirnaty n=151; Spikevax n=51  | 63.90% | Median 35 (IQR 25-50) years                 | NR                                     | NC                                                                                            | NC                                                                                                                                                                                                                       |
| 17 | Klein (27)      | Vaccine Safety Datalink analysis | 14 December 2020 – 26 June 2021 | mRNA COVID vaccines    | Electronic health records                                                                           | n=87 (myocarditis/pericarditis) | 85%    | Range 12-39 years                           | NR                                     | NC                                                                                            | NC                                                                                                                                                                                                                       |
| 18 | Knowlton (58)   | Cohort / Case-crossover          | 15 December 2020 – 15 June 2021 | All COVID vaccines     | Adult patients presenting at Intermountain Healthcare                                               | Comirnaty n=5; Spikevax n=15    | 71.40% | Median (IQR) 56 (28-70) years               | NR                                     | Within 60 days RR = 1.63 (95% CI 0.95-2.71);<br><br>Within 30 days RR=2.05 (95% CI 1.17-3.48) | NC                                                                                                                                                                                                                       |
| 19 | Kravchenko (59) | Retrospective cohort             | NR                              | mRNA COVID-19 vaccines | All patients referred for cardiac MRI to the Department of Diagnostic and Interventional Radiology, | Comirnaty n=19; Spikevax n=1    | 60%    | Mean age 28 ± 12 years                      | 75% followed 2 <sup>nd</sup> dose      | NC                                                                                            | NC                                                                                                                                                                                                                       |

| University Hospital Bonn |               |                                                      |                                   |                                 |                                                                                                                                                             |                                        |                                                         |                                                                                        |                                      |                                         |                                                                                 |
|--------------------------|---------------|------------------------------------------------------|-----------------------------------|---------------------------------|-------------------------------------------------------------------------------------------------------------------------------------------------------------|----------------------------------------|---------------------------------------------------------|----------------------------------------------------------------------------------------|--------------------------------------|-----------------------------------------|---------------------------------------------------------------------------------|
| 20                       | Lai (60)      | Case-control                                         | 23 February – 2 August 2021       | Comirnaty and Sinovac CoronaVac | Patients aged 12 and over, electronic health records provided by the Hospital Authority (HA) of Hong Kong; linked with population-based vaccination records | Comirnaty n=20                         | 62.5% of 160 carditis cases overall                     | Mean (SD) age 57.48 (24.23) years overall for vaccinated and unvaccinated participants | 13.1% followed 2 <sup>nd</sup> dose  | Carditis aOR= 3.57 (95% CI 1.93 - 6.60) | NC                                                                              |
| 21                       | Li (48)       | VAERS analysis                                       | 11 December 2020 – 13 August 2021 | All COVID vaccines              | VAERS reports                                                                                                                                               | Comirnaty n=1335 cases; Spikevax n=703 | Spikevax = 69.6%, Comirnaty = 73.8%                     | Spikevax recipients aged 18 and older, Comirnaty recipients aged 12 and older          | 63.47% followed 2 <sup>nd</sup> dose | NC                                      | Incidence rate = 5.98 (95% CI = 5.73–6.24) cases per million doses administered |
| 22                       | Li (28)       | Cohort                                               | 10 March – 18 October 2021        | Comirnaty                       | Hong Kong adolescents, electronic health records                                                                                                            | n=43 (myocarditis)                     | 88%                                                     | Mean (SD) 14.86 (1.46) years                                                           | 84% followed 2 <sup>nd</sup> dose    | NC                                      | NC                                                                              |
| 23                       | Mevorach (61) | Retrospective cohort                                 | 20 December 2020 – 31 May 2021    | Comirnaty                       | Medical records, Ministry of Health database (Israel)                                                                                                       | n=142 (myocarditis)                    | 91% of the 95 cases for whom age and sex were available | 16 years and older                                                                     | 91% followed 2 <sup>nd</sup> dose    | Rate Ratio=2.35 (95% CI, 1.10 to 5.02)  | NC                                                                              |
| 24                       | Nygaard (62)  | Prospective nationwide population-based cohort study | 15 May 2021 – 15 September 2021   | mRNA COVID vaccines             | Hospitalised adolescents                                                                                                                                    | Comirnaty n=15                         | 87%                                                     | Range 13-17 years                                                                      | 47% after 2 <sup>nd</sup> dose       | NC                                      | Males: 97 per million<br>Females: 16 per million                                |
| 25                       | Oh (63)       | Retrospective observational study                    | 1 June 2021 – 15 October 2021     | mRNA COVID vaccines             | Patients presenting at the Incheon and Daejeon hospitals' emergency departments                                                                             | n=4 (myocarditis)                      | 100%                                                    | Range 17-49 years                                                                      | 50% after 2 <sup>nd</sup> dose       | NC                                      | NC                                                                              |
| 26                       | Oster (64)    | VAERS analysis                                       | December 2020 – August 2021       | mRNA COVID vaccines             | VAERS reports                                                                                                                                               | n=1626 (myocarditis)                   | 82%                                                     | Median = 21 years (IQR 16-31)                                                          | 82% after 2 <sup>nd</sup> dose       | NC                                      | NC                                                                              |



|    |               |                                             |                                    |                               |                                                                                                              |                                       |                                                                                                                                   |                                                                                                                                                                                                        |                                          |                                                                                                                                       |                             |
|----|---------------|---------------------------------------------|------------------------------------|-------------------------------|--------------------------------------------------------------------------------------------------------------|---------------------------------------|-----------------------------------------------------------------------------------------------------------------------------------|--------------------------------------------------------------------------------------------------------------------------------------------------------------------------------------------------------|------------------------------------------|---------------------------------------------------------------------------------------------------------------------------------------|-----------------------------|
| 27 | Patone (65)   | Population-based cohort study               | NR                                 | Comirnaty or AZ               | England                                                                                                      | Myocarditis n=397; Pericarditis n=356 | Myocarditis = 50% following 1st dose, 57.8% following 2nd dose; Pericarditis = 62.7% following 1st dose, 69.3% following 2nd dose | Myocarditis 1st dose mean (SD) 55.2 (22.0) years, myocarditis 2nd dose mean (SD) 61 (22.8) years; Pericarditis 1st dose mean (SD) 57.6 (20.1) years, Pericarditis 2nd dose mean (SD) 63.2 (18.7) years | 52.1% received 1 <sup>st</sup> dose only | Myocarditis 1st dose IRR=1.31 (95% CI 1.03 - 1.66); Myocarditis 2nd dose IRR=1.30 (95% CI 0.98 - 1.72); Pericarditis - No association | NC                          |
| 28 | Sa (66)       | observational study (VAERS)                 | 14th Dec 2020 – 30th Sept 2021     | Comirnaty Spikevax or Janssen | US population, aged over 18yrs                                                                               | Comirnaty n=1072; Spikevax n=791      | NR                                                                                                                                | n=1573 18-64 years, n=193 65 years and older                                                                                                                                                           | NR                                       | NC                                                                                                                                    | NC                          |
| 29 | Simone (67)   | retrospective population-based cohort study | 14 December 2020 – 20 July 2021    | mRNA COVID vaccines           | Kaiser Permanente Southern California (KPSC) members aged 18 years and older                                 | n=15 (myocarditis)                    | 100%                                                                                                                              | Median (IQR) 52 (32-59) years                                                                                                                                                                          | 86.7% followed 2 <sup>nd</sup> dose      | 1 <sup>st</sup> dose: RR=0.38 (95%CI 0.05-1.40)<br>2 <sup>nd</sup> dose: RR=2.7 (95% CI 1.4-4.8)                                      | NC                          |
| 30 | Truong (68)   | Retrospective cohort                        | Until 4 July 2021                  | All COVID vaccines            | adolescents and young adults <21 years old, presenting at 26 paediatric medical centres across US and Canada | Comirnaty n=131, Spikevax n=5         | 90.60%                                                                                                                            | Median 15.8 (range 12.1-20.3) years                                                                                                                                                                    | 91.4% followed 2 <sup>nd</sup> dose      | NC                                                                                                                                    | NC                          |
| 31 | Tsun Lai (69) | population-based retrospective cohort study | 1 January 2018 – 30 September 2021 | Comirnaty or CoronaVac        | Inpatients 12 years and older (Hong Kong)                                                                    | N=38 (myocarditis)                    | NR                                                                                                                                | NR                                                                                                                                                                                                     | 1 or 2 doses                             | 1 <sup>st</sup> dose: IRR=9.15 (95% CI 1.14-73.16);<br>2 <sup>nd</sup> dose: IRR=29.61 (95% CI 4.04-217.07)                           |                             |
| 32 | Witberg (70)  | Population-based cohort study               | 42 days after dose 1               | Comirnaty                     | Clalit Health Services, electronic health                                                                    | n=54 (myocarditis)                    | 94%                                                                                                                               | Median (IQR) = 27 (21-35) years                                                                                                                                                                        | 1 dose                                   | NC                                                                                                                                    | Overall: 2.13 (95% CI 1.56- |

|    |          |                                                 |                          |                     | records for patients aged 16 years or older |                                                                               |        |                                           |                                   | 2.70) per 100,000 |    |
|----|----------|-------------------------------------------------|--------------------------|---------------------|---------------------------------------------|-------------------------------------------------------------------------------|--------|-------------------------------------------|-----------------------------------|-------------------|----|
| 33 | Yap (71) | Reports to Singapore's vaccine safety committee | January 2021 – July 2021 | mRNA COVID vaccines | Singapore                                   | n=34 (pericarditis, myocarditis, or concomitant pericarditis and myocarditis) | 82.40% | Myocarditis median 23 (range 12-55) years | 64% followed 2 <sup>nd</sup> dose | NC                | NC |

NR = Not Reported; NC = Not calculated; SD = Standard Deviation; CI = Confidence Interval; aOR = Adjusted Odds Ratio

Table 6: Results of studies identified by systematic review, including the number of events, fatal cases, sex, and vaccine dose.

|           | Myocarditis |        | Myopericarditis |        | Pericarditis |       | Total cases |        | Fatal cases |       | Males (where specified) |       | Females (where specified) |       | Single dose |       | Two doses |       | Dose unspecified |       |
|-----------|-------------|--------|-----------------|--------|--------------|-------|-------------|--------|-------------|-------|-------------------------|-------|---------------------------|-------|-------------|-------|-----------|-------|------------------|-------|
|           | n           | %      | n               | %      | n            | %     | n           | %      | n           | %     | n                       | %     | n                         | %     | n           | %     | n         | %     | n                | %     |
| <b>1</b>  | 21          | 43.75  | 27              | 56.25  | 0            | 0.00  | 48          | 100.00 | NR          |       | NR                      |       | NR                        |       | NR          |       | NR        |       | NR               |       |
| <b>2</b>  | 1241        | 54.94  | 851             | 37.67  | 167          | 7.39  | 2259        | 100.00 | 22          | 45.83 | 1555                    | 68.84 | 722                       | 31.96 | NR          |       | NR        |       | NR               |       |
| <b>3</b>  | 33          | 100.00 | 0               | 0.00   | 0            | 0.00  | 33          | 100.00 | NR          |       | 29                      | 87.88 | 4                         | 12.12 | 6           | 18.18 | 27        | 81.82 | 0                | 0     |
| <b>4</b>  | 20          | 36.36  | 0               | 0.00   | 35           | 63.64 | 55          | 100.00 | NR          |       | 42                      | 76.36 | 15                        | 27.27 | NR          |       | NR        |       | NR               |       |
| <b>5</b>  | 0           | 0.00   | 4               | 100.00 | 0            | 0.00  | 4           | 100.00 | NR          |       | 2                       | 50    | 2                         | 50    | 3           | 75    | 1         | 25    | 0                | 0     |
| <b>6</b>  | 0           | 0.00   | 10              | 100.00 | 0            | 0.00  | 10          | 100.00 | NR          |       | 6                       | 60    | 6                         | 60    | 3           | 30    | 7         | 70    | 0                | 0     |
| <b>7</b>  | 191         | 78.93  | 2               | 0.83   | 49           | 20.25 | 242         | 100.00 | 1           | 0.41  | 205                     | 84.71 | 37                        | 15.29 | 37          | 15.29 | 68        | 28.1  | 139              | 57.44 |
| <b>8</b>  | 21          | 100.00 | 0               | 0.00   | 0            | 0.00  | 21          | 100.00 | NR          |       | 17                      | 80.95 | 4                         | 19.05 | NR          |       | NR        |       | NR               |       |
| <b>9</b>  | 1226        | 100.00 | 0               | 0.00   | 0            | 0.00  | 1226        | 100.00 | 0           | 0.00  | 923                     | 75.29 | 289                       | 23.57 | 263         | 21.45 | 831       | 67.78 | 0                | 0     |
| <b>10</b> | 0           | 0.00   | 12              | 100.00 | 0            | 0.00  | 12          | 100.00 | 0           | 0.00  | NR                      |       | NR                        |       | NR          |       | NR        |       | NR               |       |
| <b>11</b> | 1579        | 59.77  | 0               | 0.00   | 1063         | 40.23 | 2642        | 100.00 | NR          |       | 1906                    | 72.14 | 736                       | 27.86 | NR          |       | NR        |       | NR               |       |
| <b>12</b> | 397         | 100.00 | 0               | 0.00   | 0            | 0.00  | 397         | 100.00 | 0           | 0.00  | NR                      |       | NR                        |       | NR          |       | NR        |       | NR               |       |
| <b>13</b> | 48          | 69.57  | 21              | 30.43  | 0            | 0.00  | 69          | 100.00 | NR          |       | NR                      |       | NR                        |       | NR          |       | NR        |       | NR               |       |
| <b>14</b> | 63          | 100.00 | 0               | 0.00   | 0            | 0.00  | 63          | 100.00 | NR          |       | 58                      | 92.06 | 5                         | 7.94  | 1           | 1.59  | 62        | 98.41 | 0                | 0     |
| <b>15</b> | 156         | 100.00 | 0               | 0.00   | 0            | 0.00  | 156         | 100.00 | 5           | 3.21  | 131                     | 83.97 | 74                        | 47.44 | NR          |       | NR        |       | NR               |       |
| <b>16</b> | 0           | 0.00   | 34              | 100.00 | 0            | 0.00  | 34          | 100.00 | NR          |       | 29                      | 85.29 | 5                         | 14.71 | 9           | 26.47 | 24        | 70.59 | 1                | 2.94  |
| <b>17</b> | 0           | 0.00   | 20              | 100.00 | 0            | 0.00  | 20          | 100.00 | 1           | 5.00  | 15                      | 75    | 6                         | 30    | 13          | 65    | 7         | 35    | 0                | 0     |
| <b>18</b> | 20          | 100.00 | 0               | 0.00   | 0            | 0.00  | 20          | 100.00 | NR          |       | 12                      | 60    | 8                         | 40    | 5           | 25    | 15        | 75    | 0                | 0     |
| <b>19</b> | 0           | 0.00   | 20              | 100.00 | 0            | 0.00  | 20          | 100.00 | NR          |       | NR                      |       | NR                        |       | NR          |       | NR        |       | NR               |       |
| <b>20</b> | 0           | 0.00   | 2038            | 100.00 | 0            | 0.00  | 2038        | 100.00 | NR          |       | 1474                    | 72.33 | 535                       | 26.25 | NR          |       | NR        |       | NR               |       |
| <b>21</b> | 43          | 100.00 | 0               | 0.00   | 0            | 0.00  | 43          | 100.00 | NR          |       | 38                      | 88.37 | 5                         | 11.63 | 7           | 16.28 | 36        | 83.72 | 0                | 0     |
| <b>22</b> | 182         | 100.00 | 0               | 0.00   | 0            | 0.00  | 182         | 100.00 | 1           | 0.55  | NR                      |       | NR                        |       | 0           | 0     | 142       | 78.02 | 40               | 21.98 |

|                    |      |        |      |        |      |       |       |        |    |      |      |       |      |       |     |       |      |       |     |      |
|--------------------|------|--------|------|--------|------|-------|-------|--------|----|------|------|-------|------|-------|-----|-------|------|-------|-----|------|
| <b>23</b>          | 0    | 0.00   | 12   | 80.00  | 3    | 20.00 | 15    | 100.00 | 0  | 0.00 | 13   | 86.67 | 2    | 13.33 | 8   | 53.33 | 7    | 46.67 | 0   | 0    |
| <b>24</b>          | 4    | 100.00 | 0    | 0.00   | 0    | 0.00  | 4     | 100.00 | 0  | 0.00 | 4    | 100   | 0    | 0     | 2   | 50    | 2    | 50    | 0   | 0    |
| <b>25</b>          | 1625 | 70.38  | 0    | 0.00   | 684  | 29.62 | 2309  | 100.00 | 0  | 0.00 | 1334 | 57.77 | 290  | 12.56 | 273 | 11.82 | 1265 | 54.79 | 0   | 0    |
| <b>26</b>          | 158  | 54.11  | 0    | 0.00   | 134  | 45.89 | 292   | 100.00 | NR |      | 173  | 59.25 | 119  | 40.75 | 153 | 52.4  | 139  | 47.6  | 0   | 0    |
| <b>27</b>          | 0    | 0.00   | 1072 | 100.00 | 0    | 0.00  | 1072  | 100.00 | NR |      | NR   |       | NR   |       | NR  |       | NR   |       | NR  |      |
| <b>28</b>          | 15   | 100.00 | 0    | 0.00   | 0    | 0.00  | 15    | 100.00 | NR |      | 15   | 100   | 0    | 0     | 2   | 13.33 | 13   | 86.67 | 0   | 0    |
| <b>29</b>          | 146  | 100.00 | 0    | 0.00   | 0    | 0.00  | 146   | 100.00 | NR |      | 126  | 86.3  | 20   | 13.7  | 12  | 8.22  | 134  | 91.78 | 0   | 0    |
| <b>30</b>          | 38   | 100.00 | 0    | 0.00   | 0    | 0.00  | 38    | 100.00 | NR |      | NR   |       | NR   |       | 8   | 21.05 | 30   | 78.95 | 0   | 0    |
| <b>31</b>          | 54   | 100.00 | 0    | 0.00   | 0    | 0.00  | 54    | 100.00 | NR |      | 51   | 94.44 | 3    | 5.56  | 17  | 31.48 | 37   | 68.52 | 0   | 0    |
| <b>32</b>          | 14   | 41.18  | 11   | 32.35  | 9    | 26.47 | 34    | 100.00 | 0  | 0.00 | 28   | 82.35 | 6    | 17.65 | 15  | 44.12 | 19   | 55.88 | 0   | 0    |
| <b>Total</b>       | 7295 |        | 4134 |        | 2144 |       | 13573 |        | 30 |      | 8186 |       | 2893 |       | 837 |       | 2866 |       | 180 |      |
| <b>Average (%)</b> |      | 59.66  |      | 32.42  |      | 7.92  |       | 100.00 |    | 4.58 |      | 78.33 |      | 22.86 |     | 29.00 |      | 64.72 |     | 4.12 |

## **Declarations**

### **Transparency statement**

The manuscript's guarantor affirms that the manuscript is an honest, accurate, and transparent account of the study being reported, and that no important aspects of the study have been omitted.

### **Ethics approval**

Ethics approval was not required.

### **Funding**

No external funding was received for the preparation of this manuscript.

### **Conflicts of interest**

All authors have completed the Unified Competing Interest form (available on request from the corresponding author) and declare: The Drug Safety Research Unit (DSRU) is a registered independent charity (No. 327206) associated with the University of Portsmouth. The DSRU receives donations and grants from pharmaceutical companies; however, the companies have no control over the conduct or publication of its studies. The DSRU has received grants to conduct unconditional studies on the Oxford/AstraZeneca COVID-19 vaccine and is in negotiations to receiving grants for conducting CPRD studies for Pfizer, Moderna, and Janssen COVID-19 vaccines. The DSRU has conducted benefit-risk studies on products for COVID-19, including remdesivir, lopinavir/ritonavir, chloroquine and hydroxychloroquine, and convalescent plasma. Professor Shakir is the principal investigator for an active surveillance study for the Oxford/AstraZeneca vaccine, but this assessment is unrelated to this study. Professor Shakir has been a member of Data Safety Monitoring Boards for Ipsen, Biogen, and Diurnal. None of these companies have any involvement with COVID-19 vaccines. Professor Shakir was invited by AstraZeneca to advise on the events of thrombosis with thrombocytopenia with the COVID-19 vaccine and to be a member of an advisory committee on a safety study of the Oxford/AstraZeneca vaccine in Europe. Samantha Lane and Alison Yeomans have no conflicts of interest with regard to this study.

### **Authors' contributions**

SL and AY were responsible for data acquisition, analyses, and interpretation. All authors were responsible for study conception, drafting and reviewing the manuscript, and approval of the final version for publication.

### **Data sharing**

CASP checklists for assessing quality of each study included in systematic review are available on request.

## Identification of studies via databases and registers

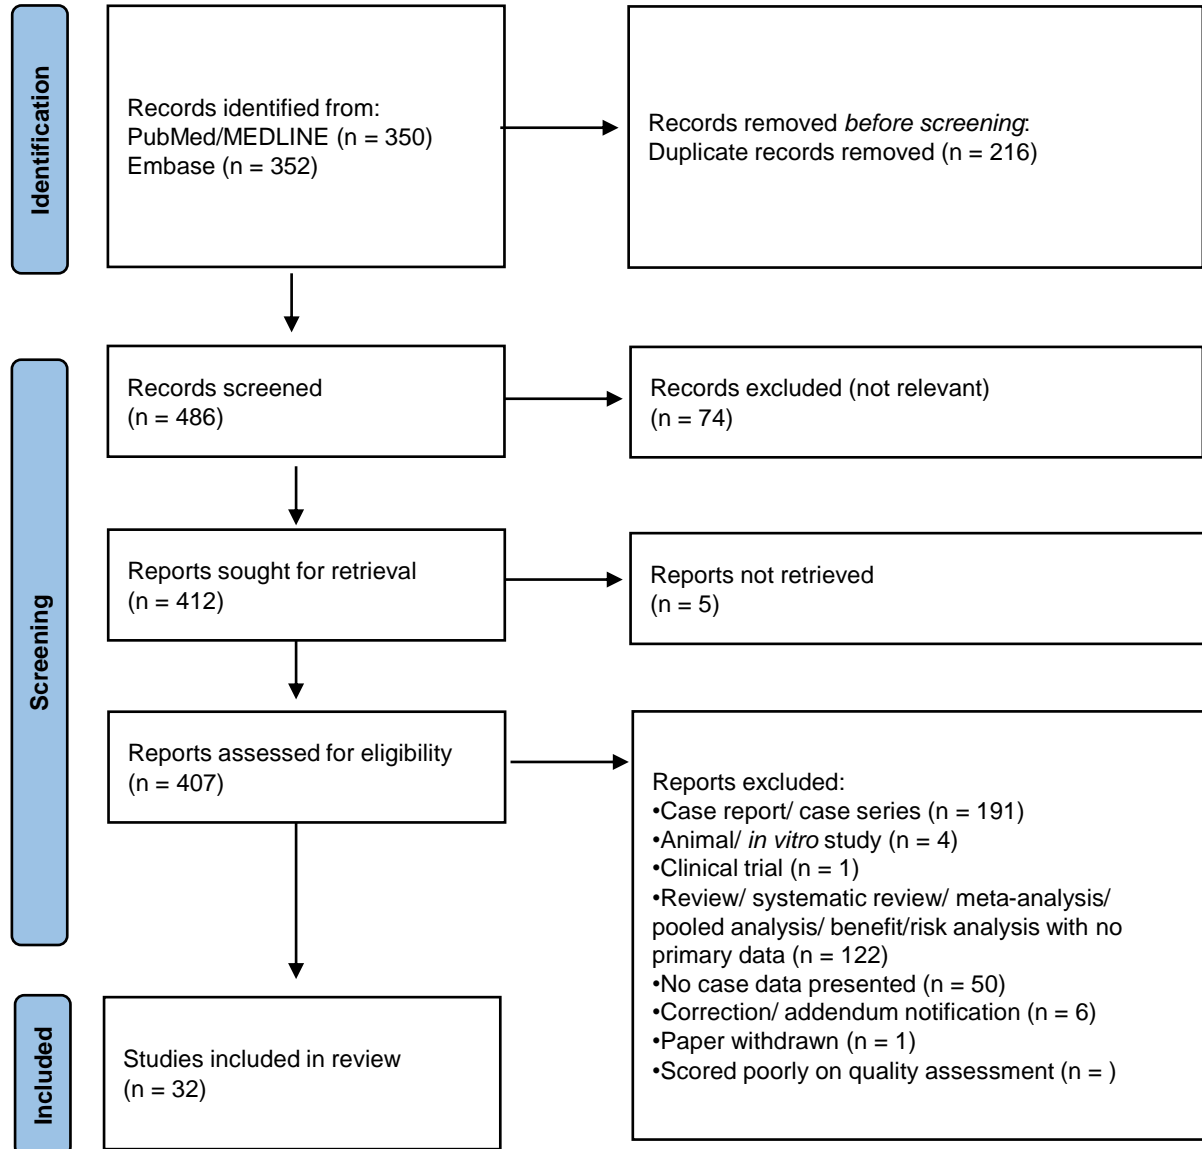

**A**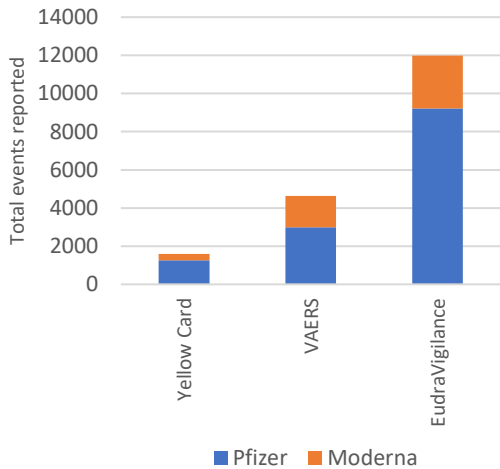**B**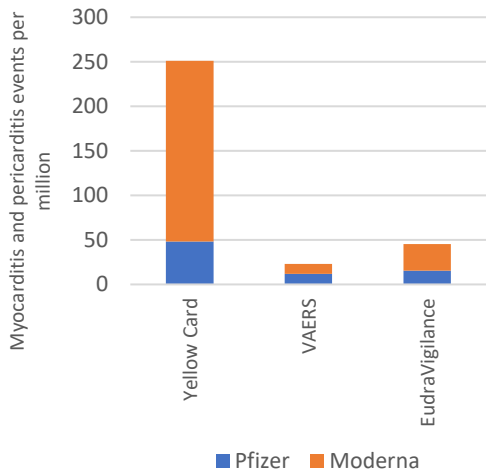

**A**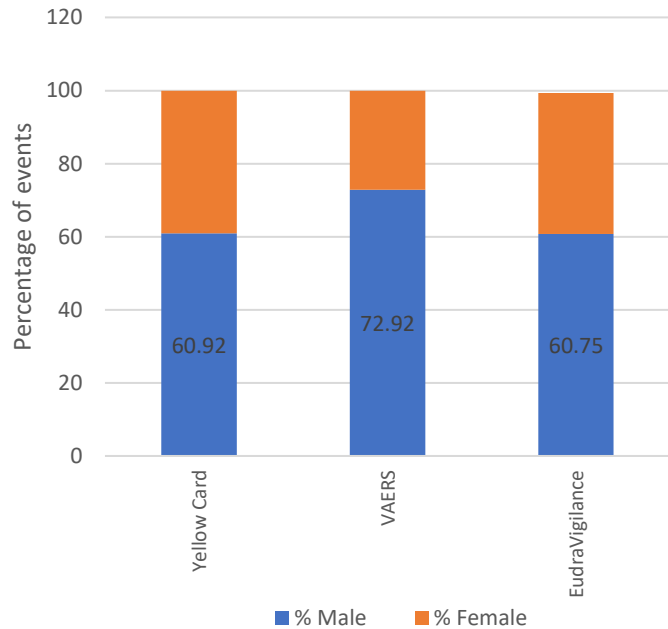**B**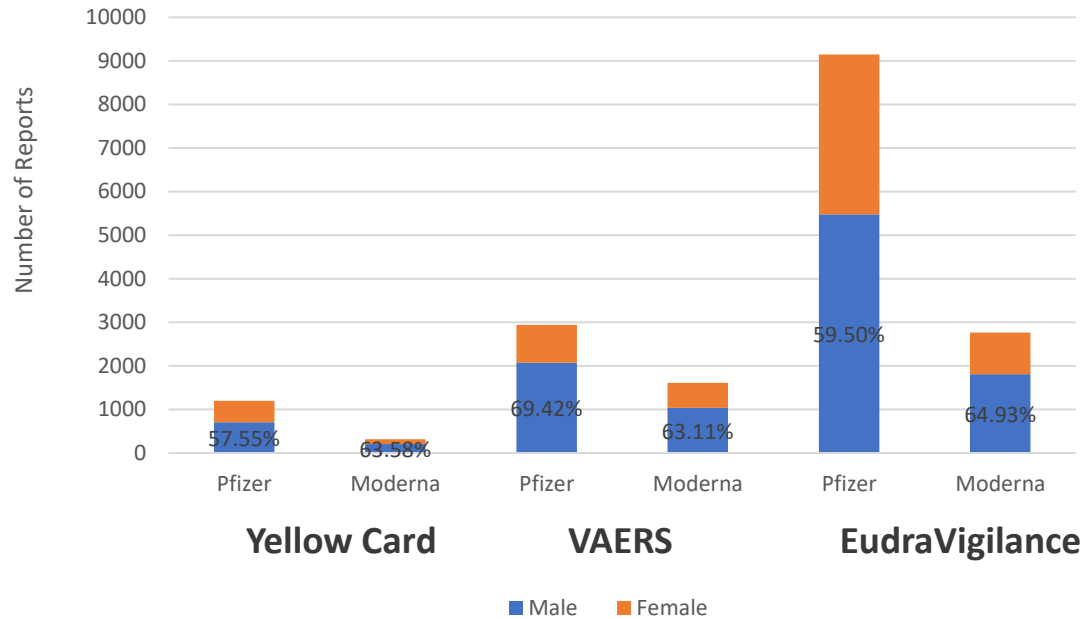



A

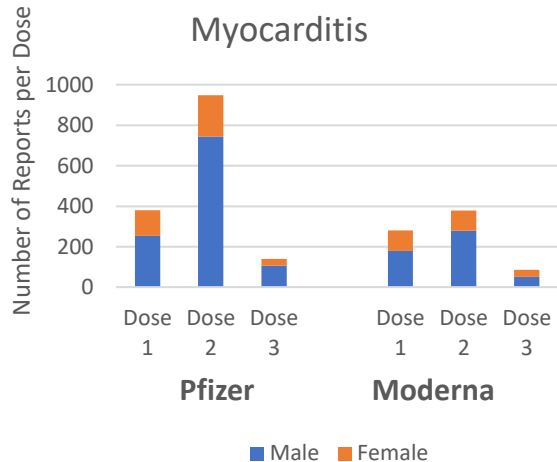

B

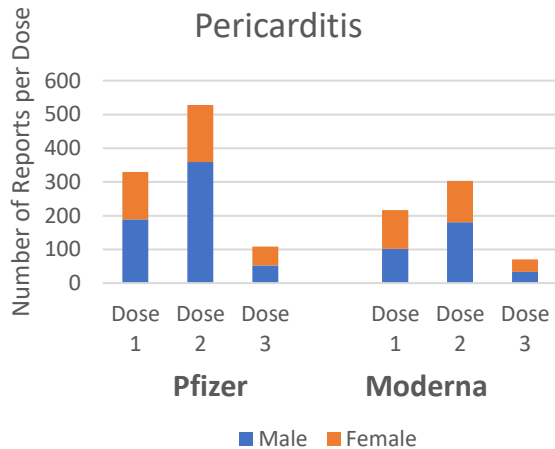

Source: https://medrxiv.org/content/10.1101/2021.09.09.21263342v3.full.pdf
